# Supplementary material
Source: PubMed Central journal article supplement (PMC3749744)
Supplement: Supp_Data.pdf [file Supp_Data.pdf]

## Supplementary Data

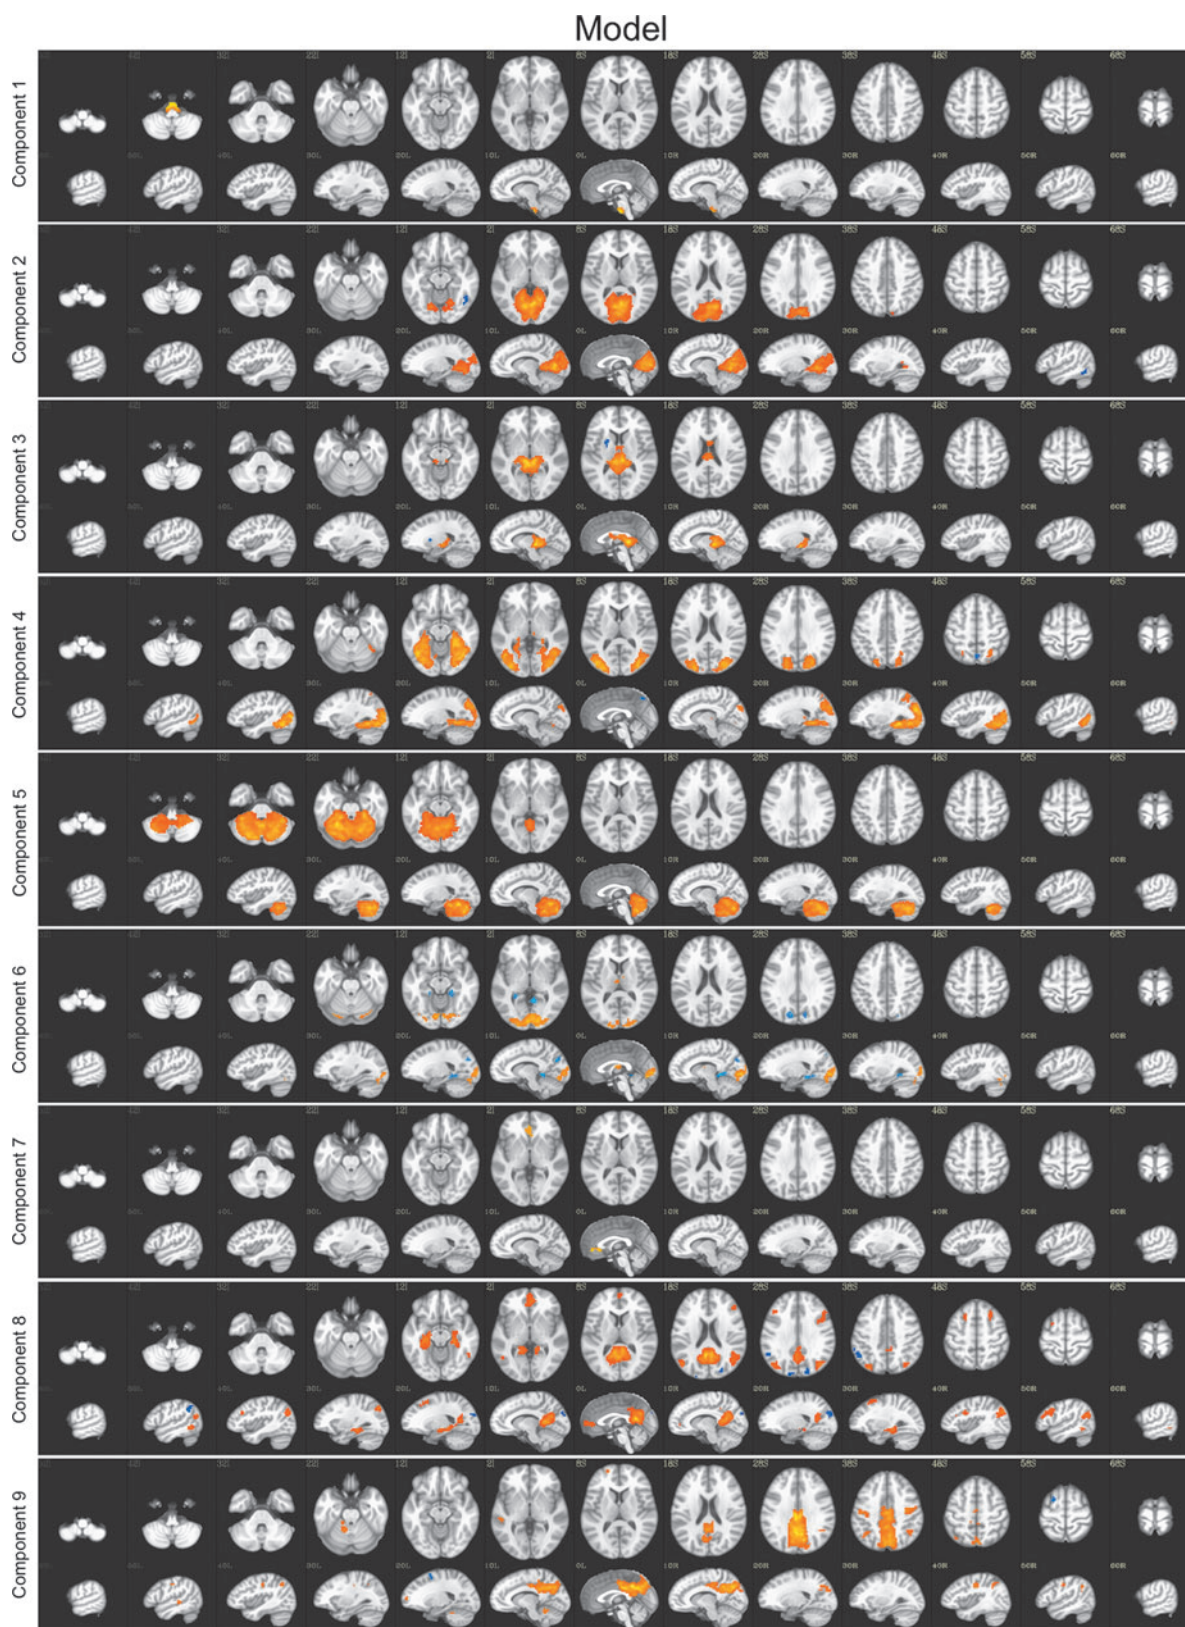

**SUPPLEMENTARY FIG. S1–S16.** Present independent component analyses (ICA) maps for model dataset (Figs. 1–4), as well as the test datasets for visit one (Figs. 5–8) and visit two (Figs. 9–12). Figures 13–16 exhibit components maps of the ICA analysis, where visits 1 and 2 were combined.

Model

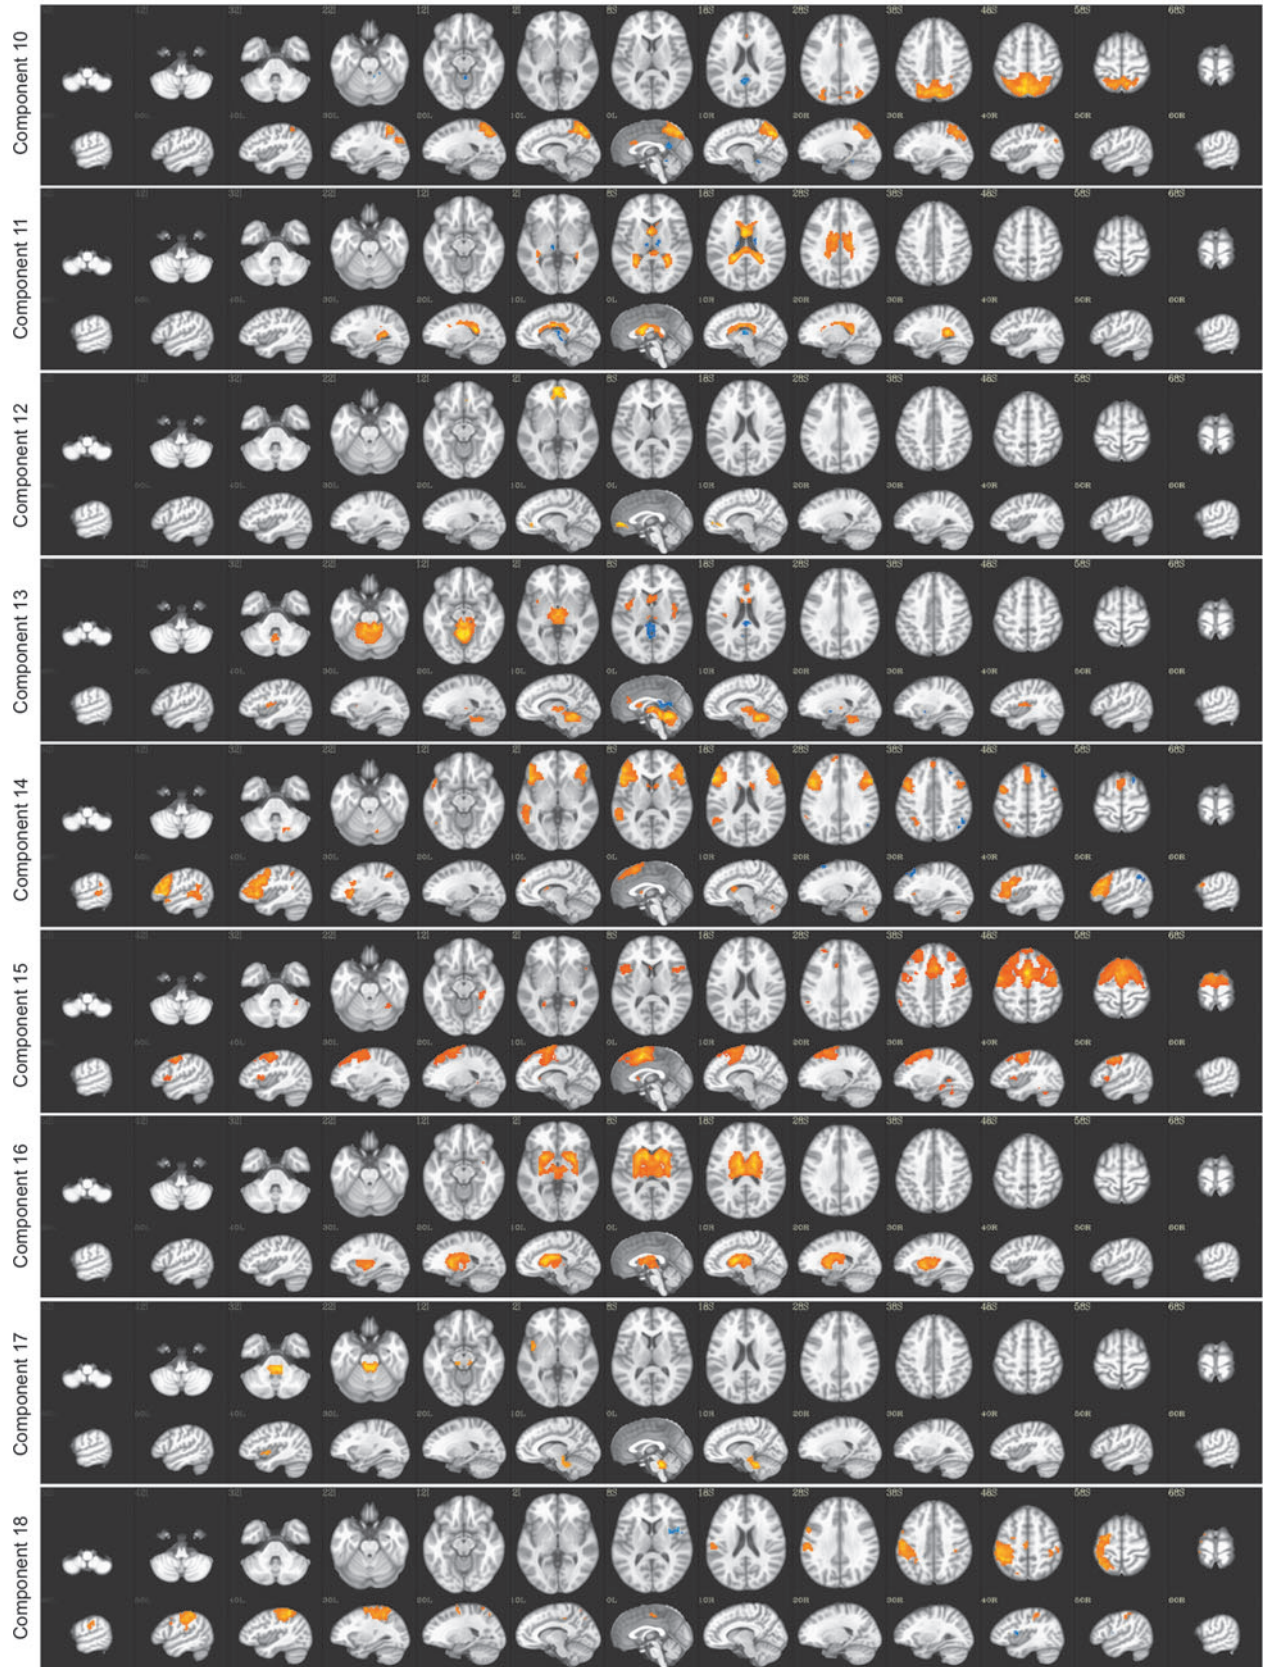

SUPPLEMENTARY FIG. S2.

Model

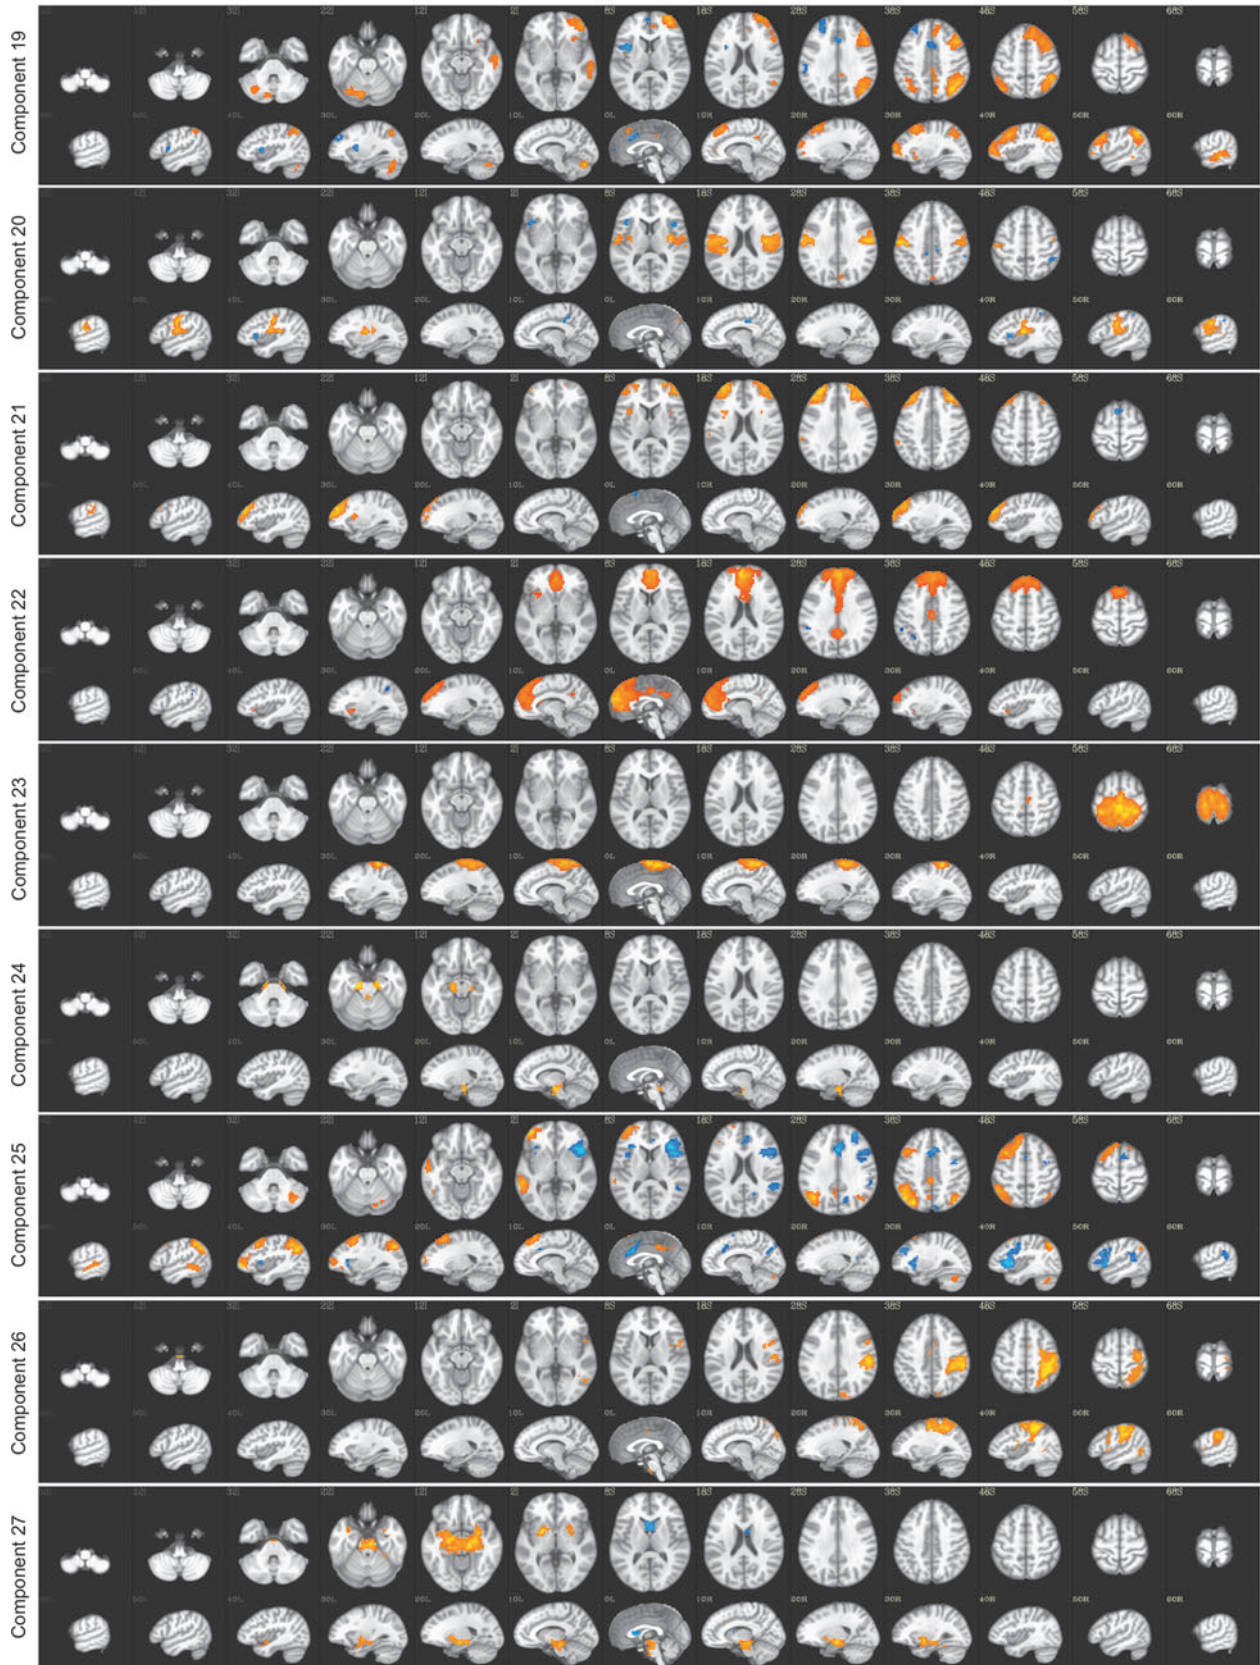

SUPPLEMENTARY FIG. S3.

Model

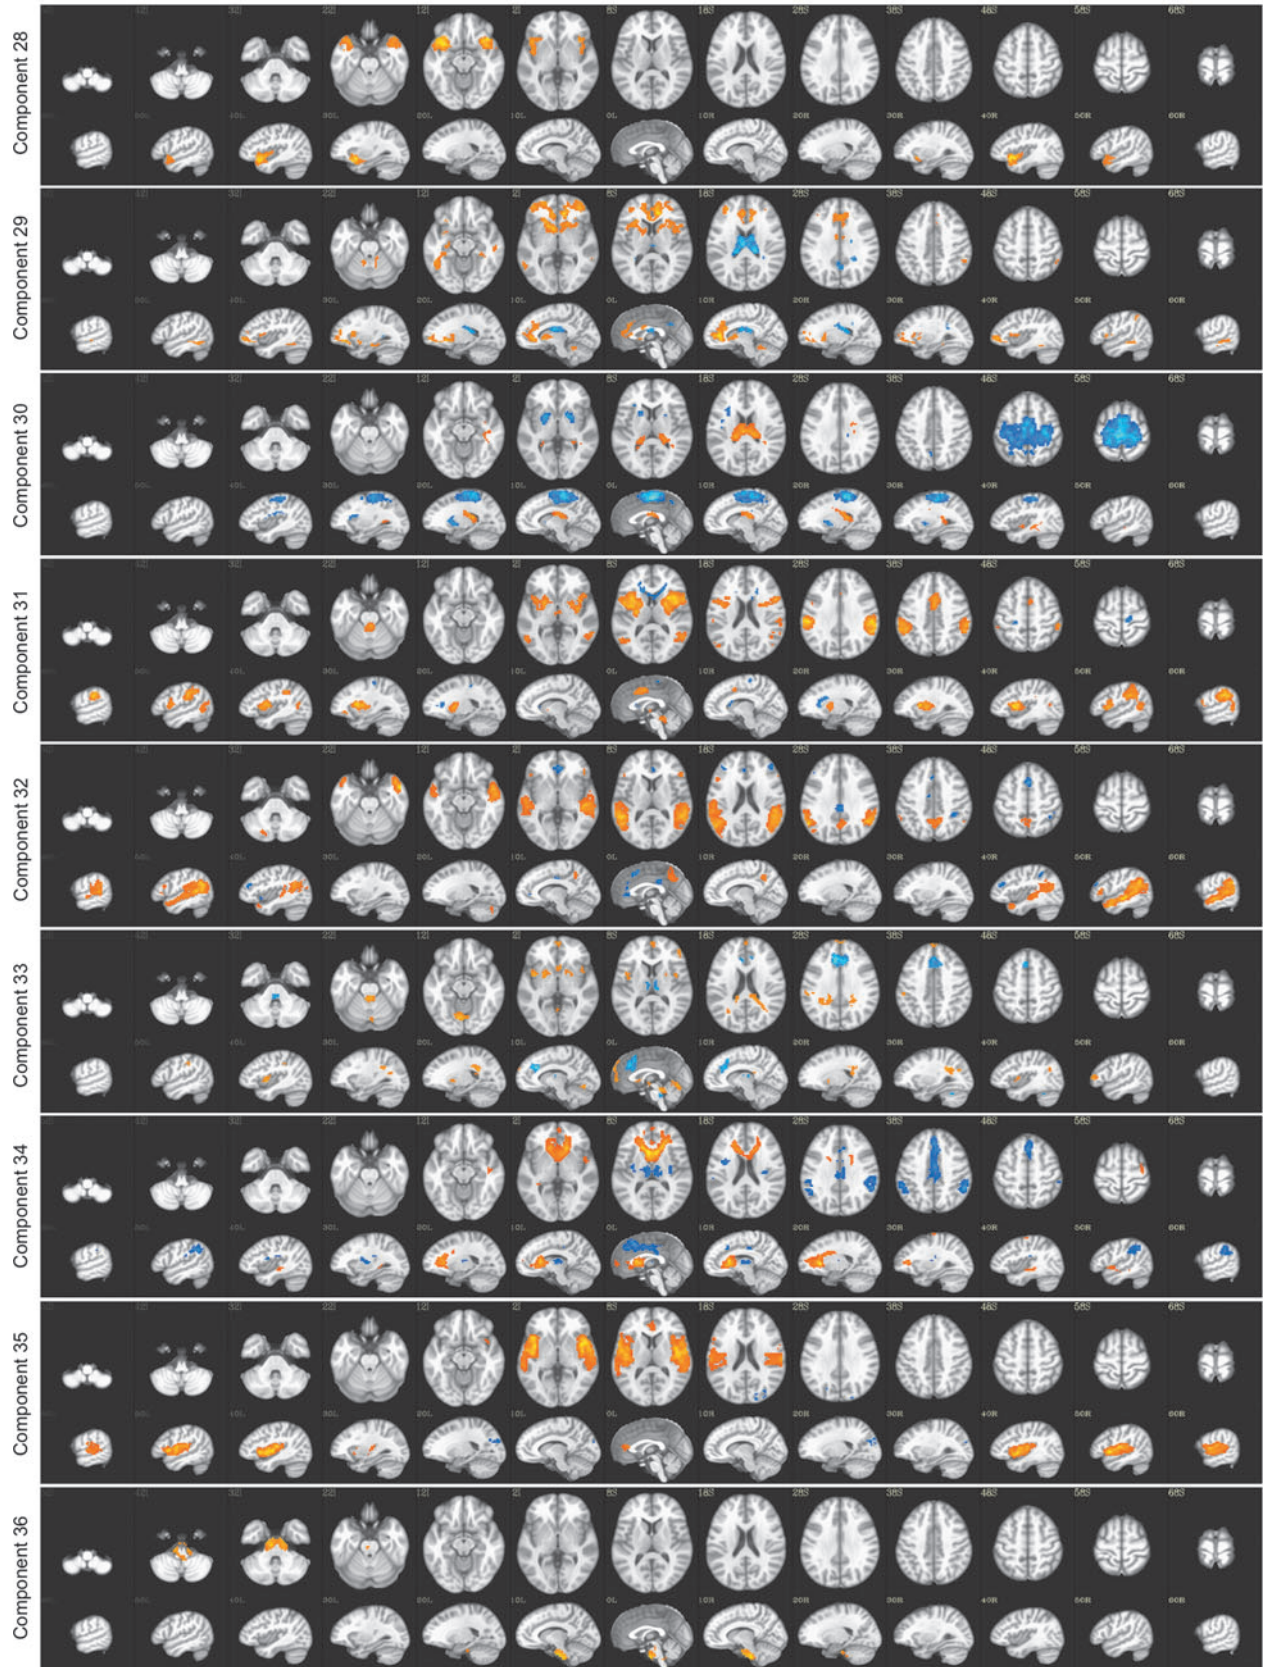

SUPPLEMENTARY FIG. S4.

# Test – Visit 1

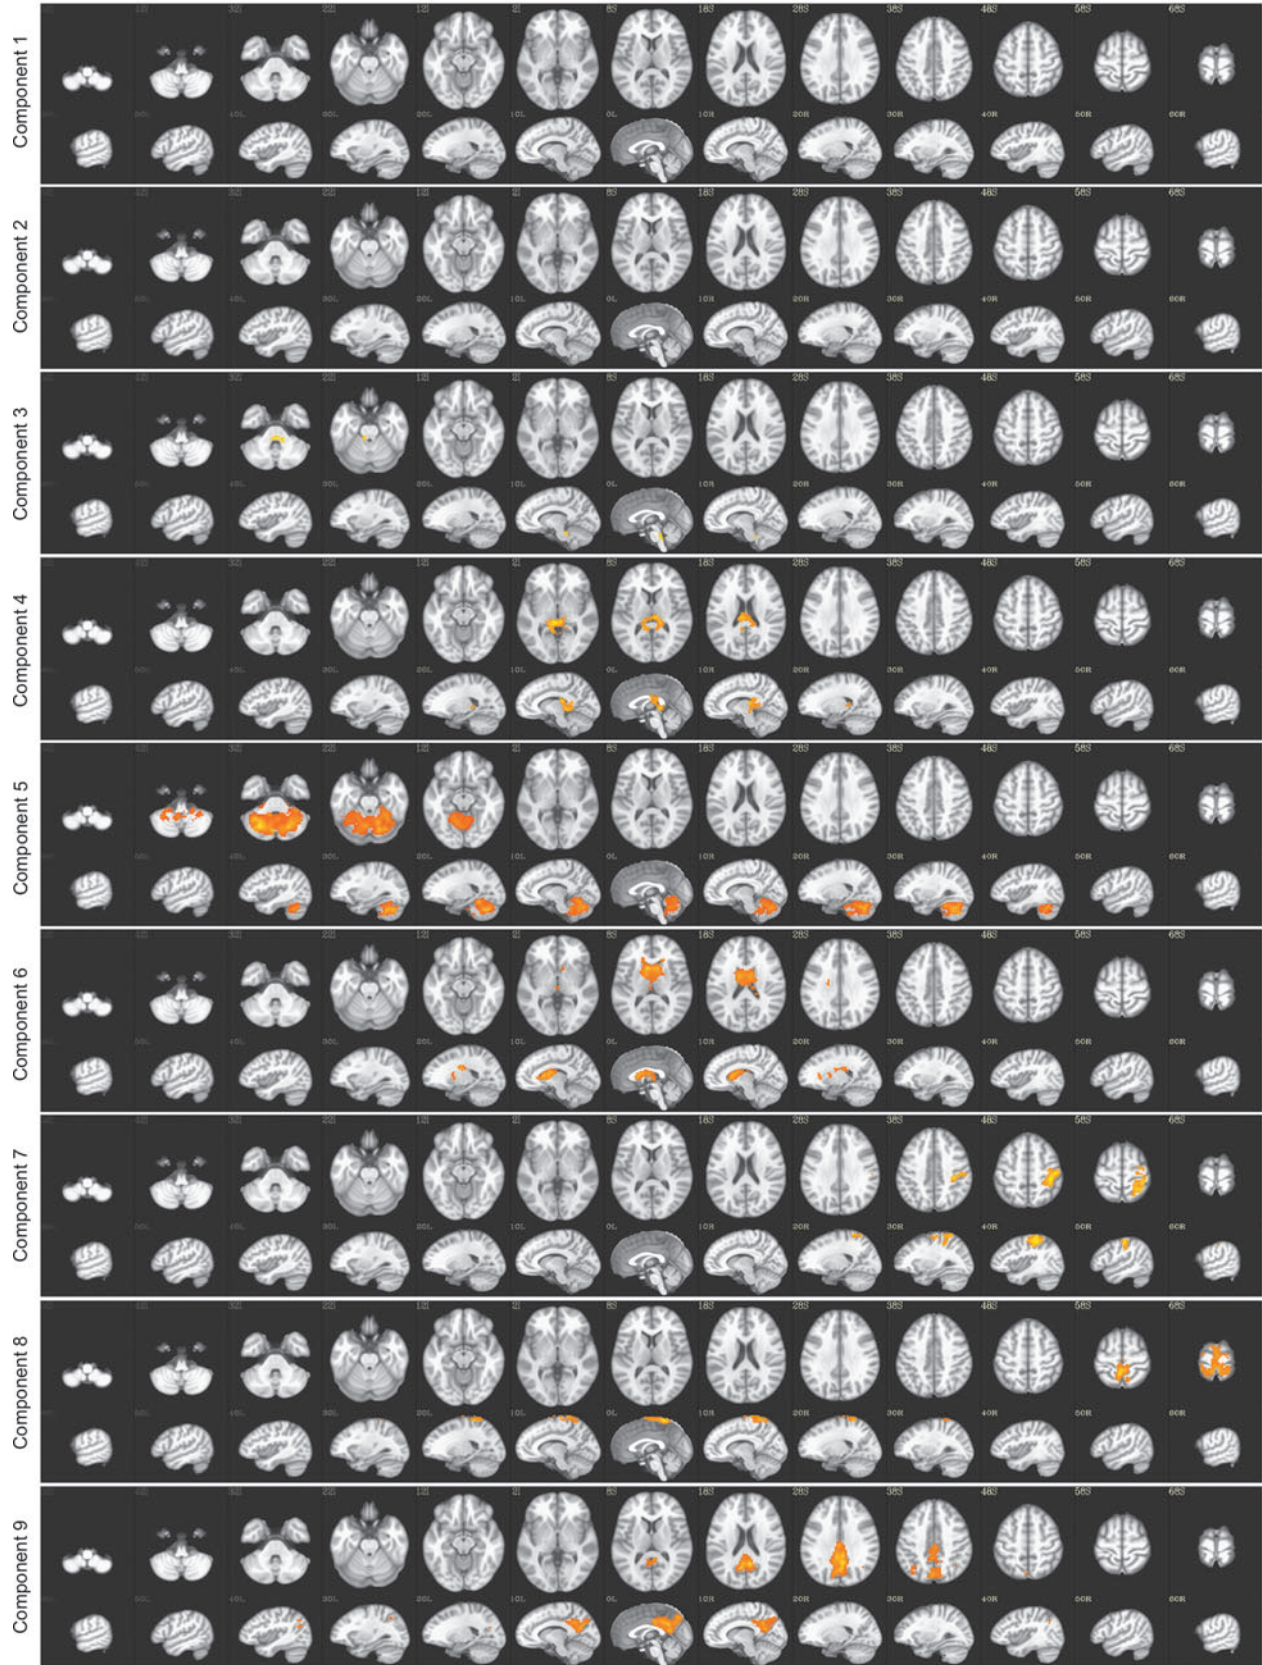

SUPPLEMENTARY FIG. S5.

Test – Visit 1

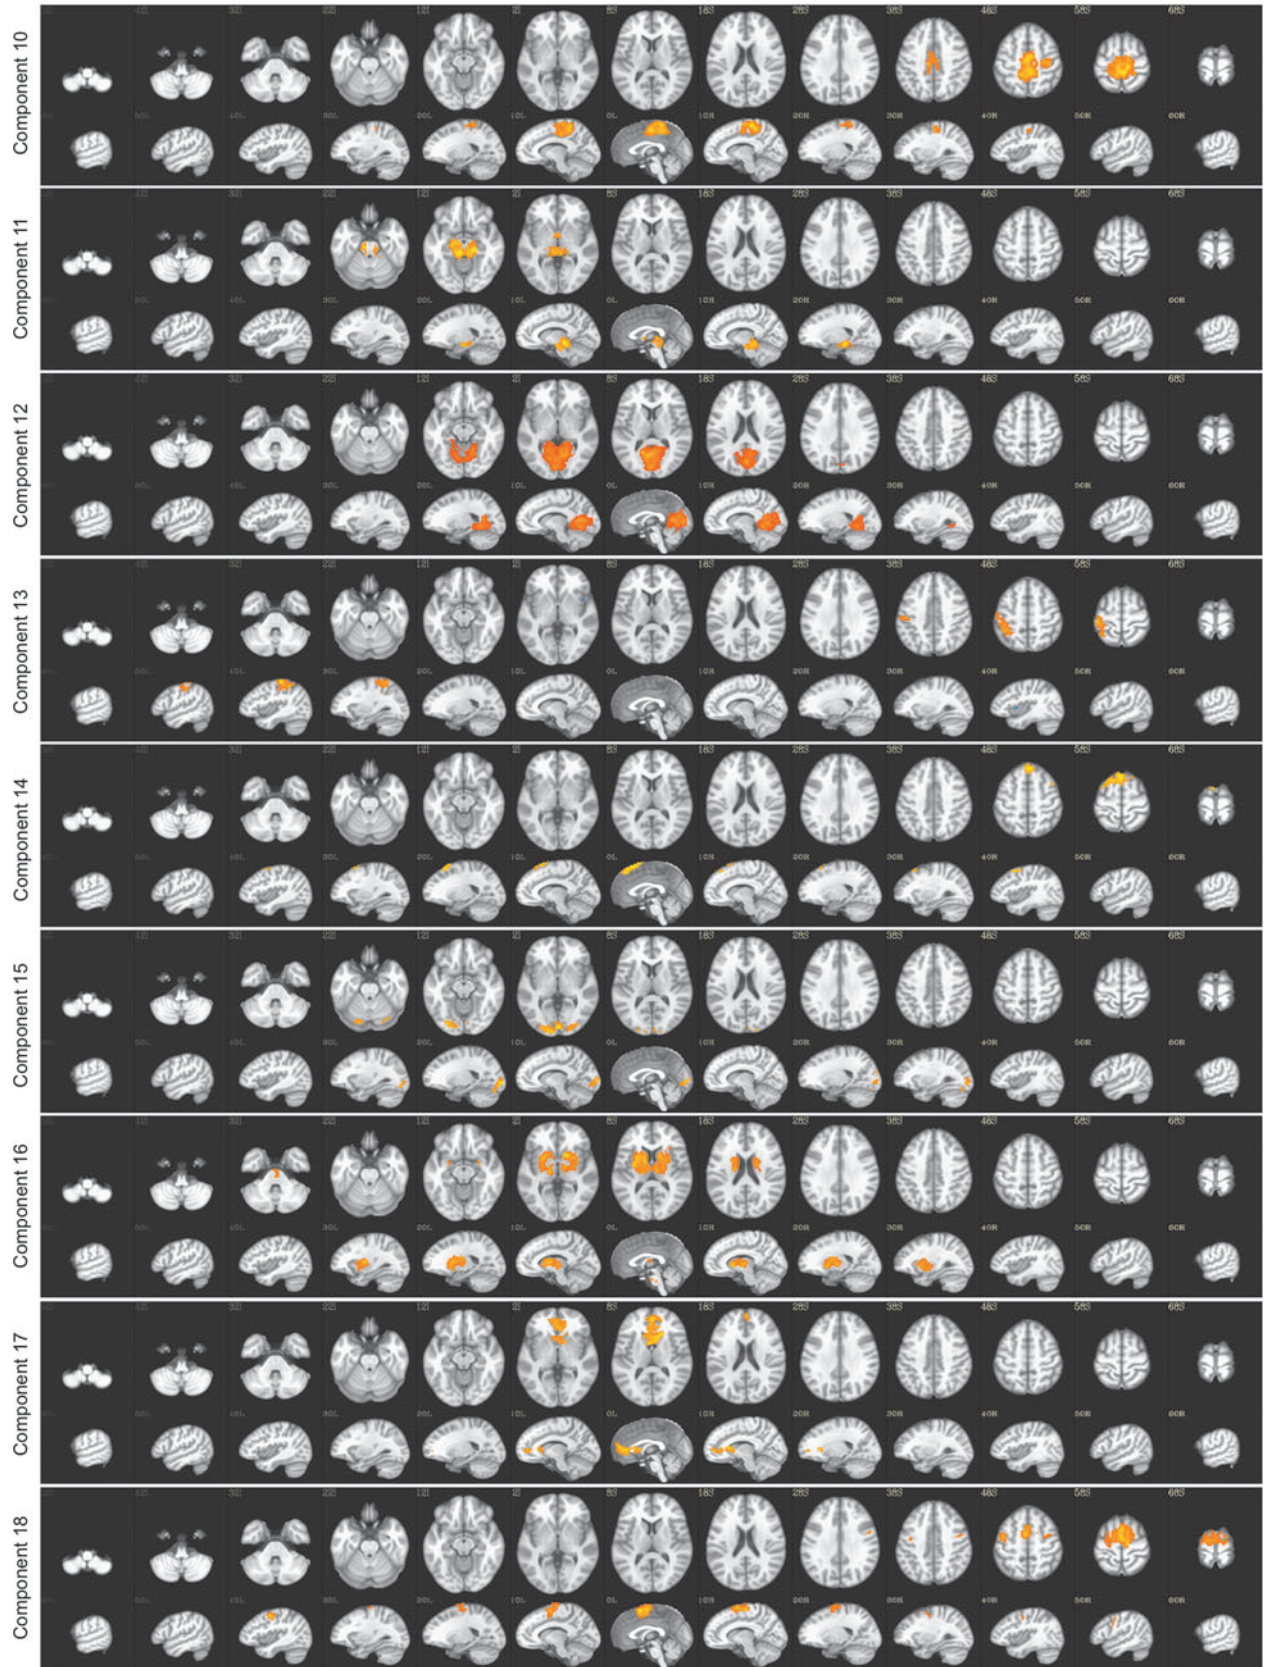

SUPPLEMENTARY FIG. S6.

Test – Visit 1

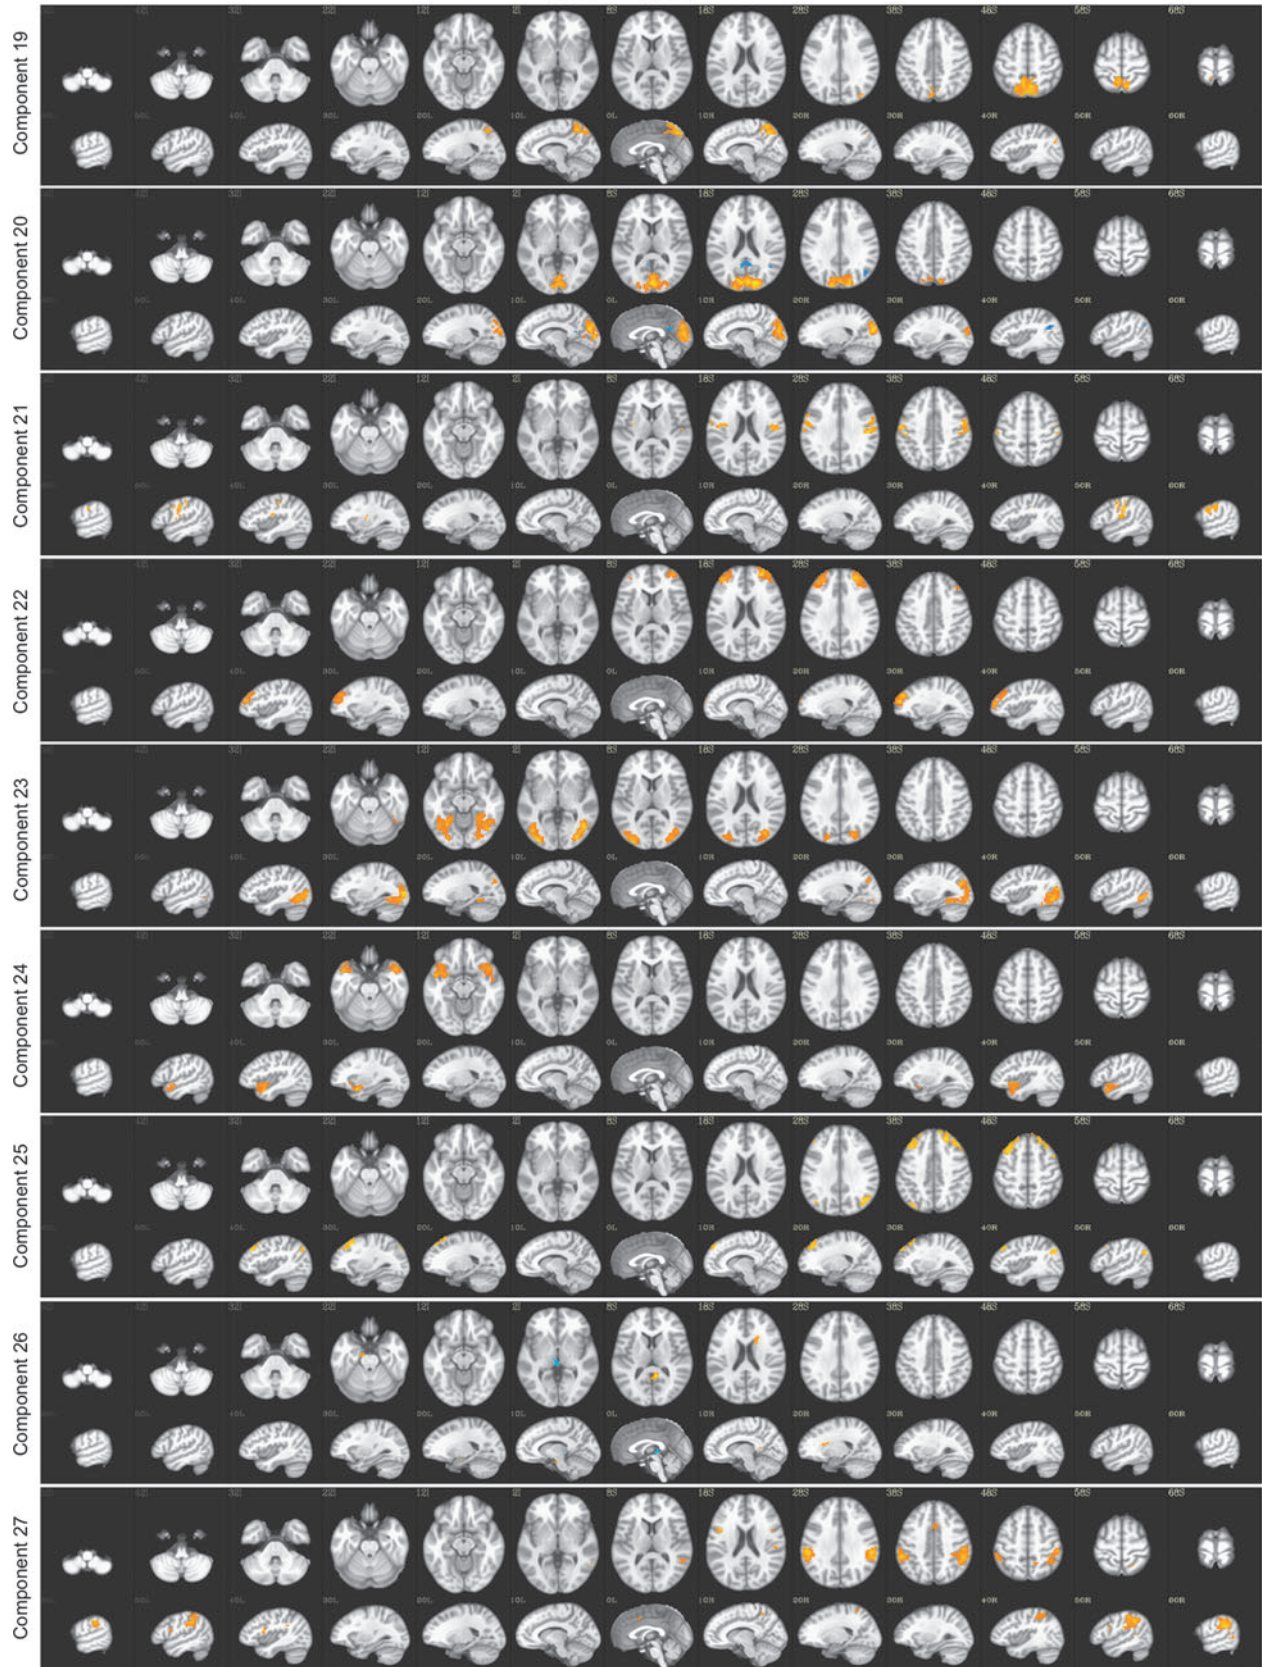

SUPPLEMENTARY FIG. S7.

Test – Visit 1

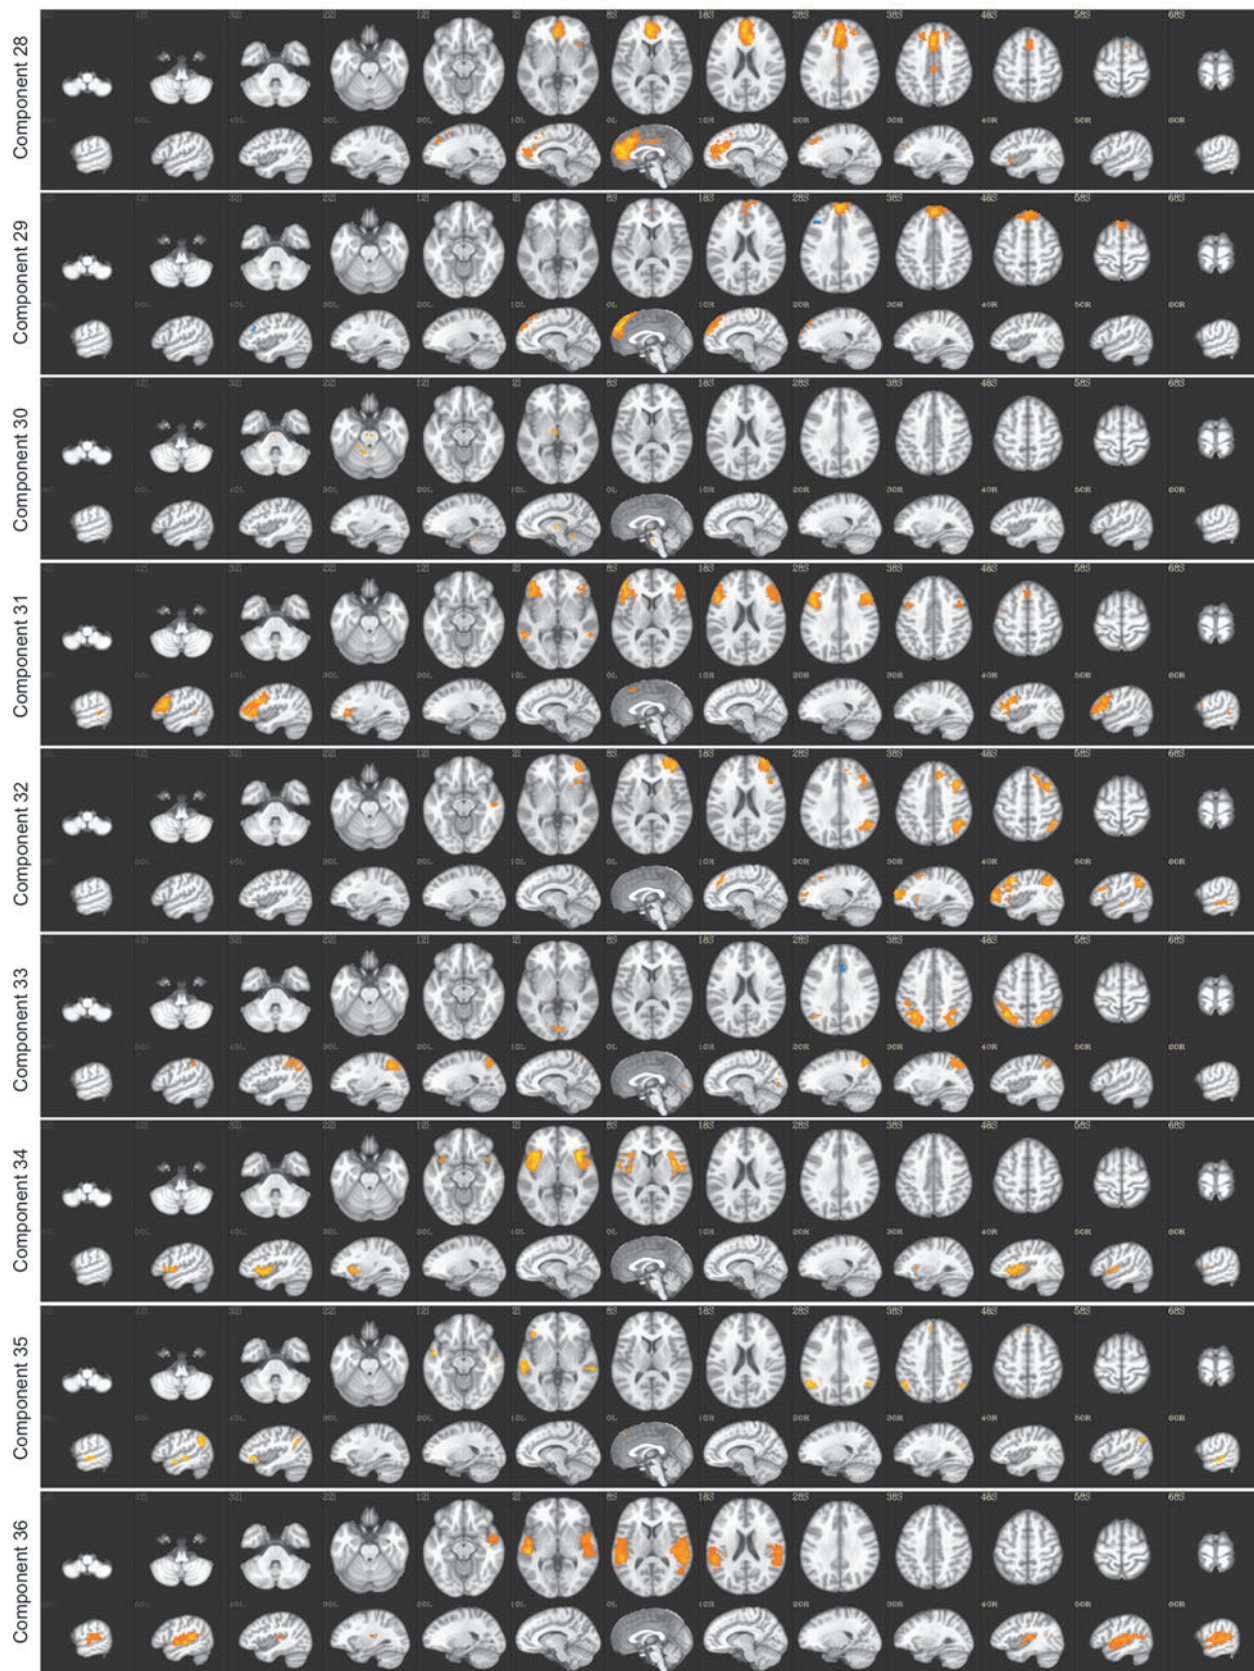

SUPPLEMENTARY FIG. S8.



Test – Visit 2

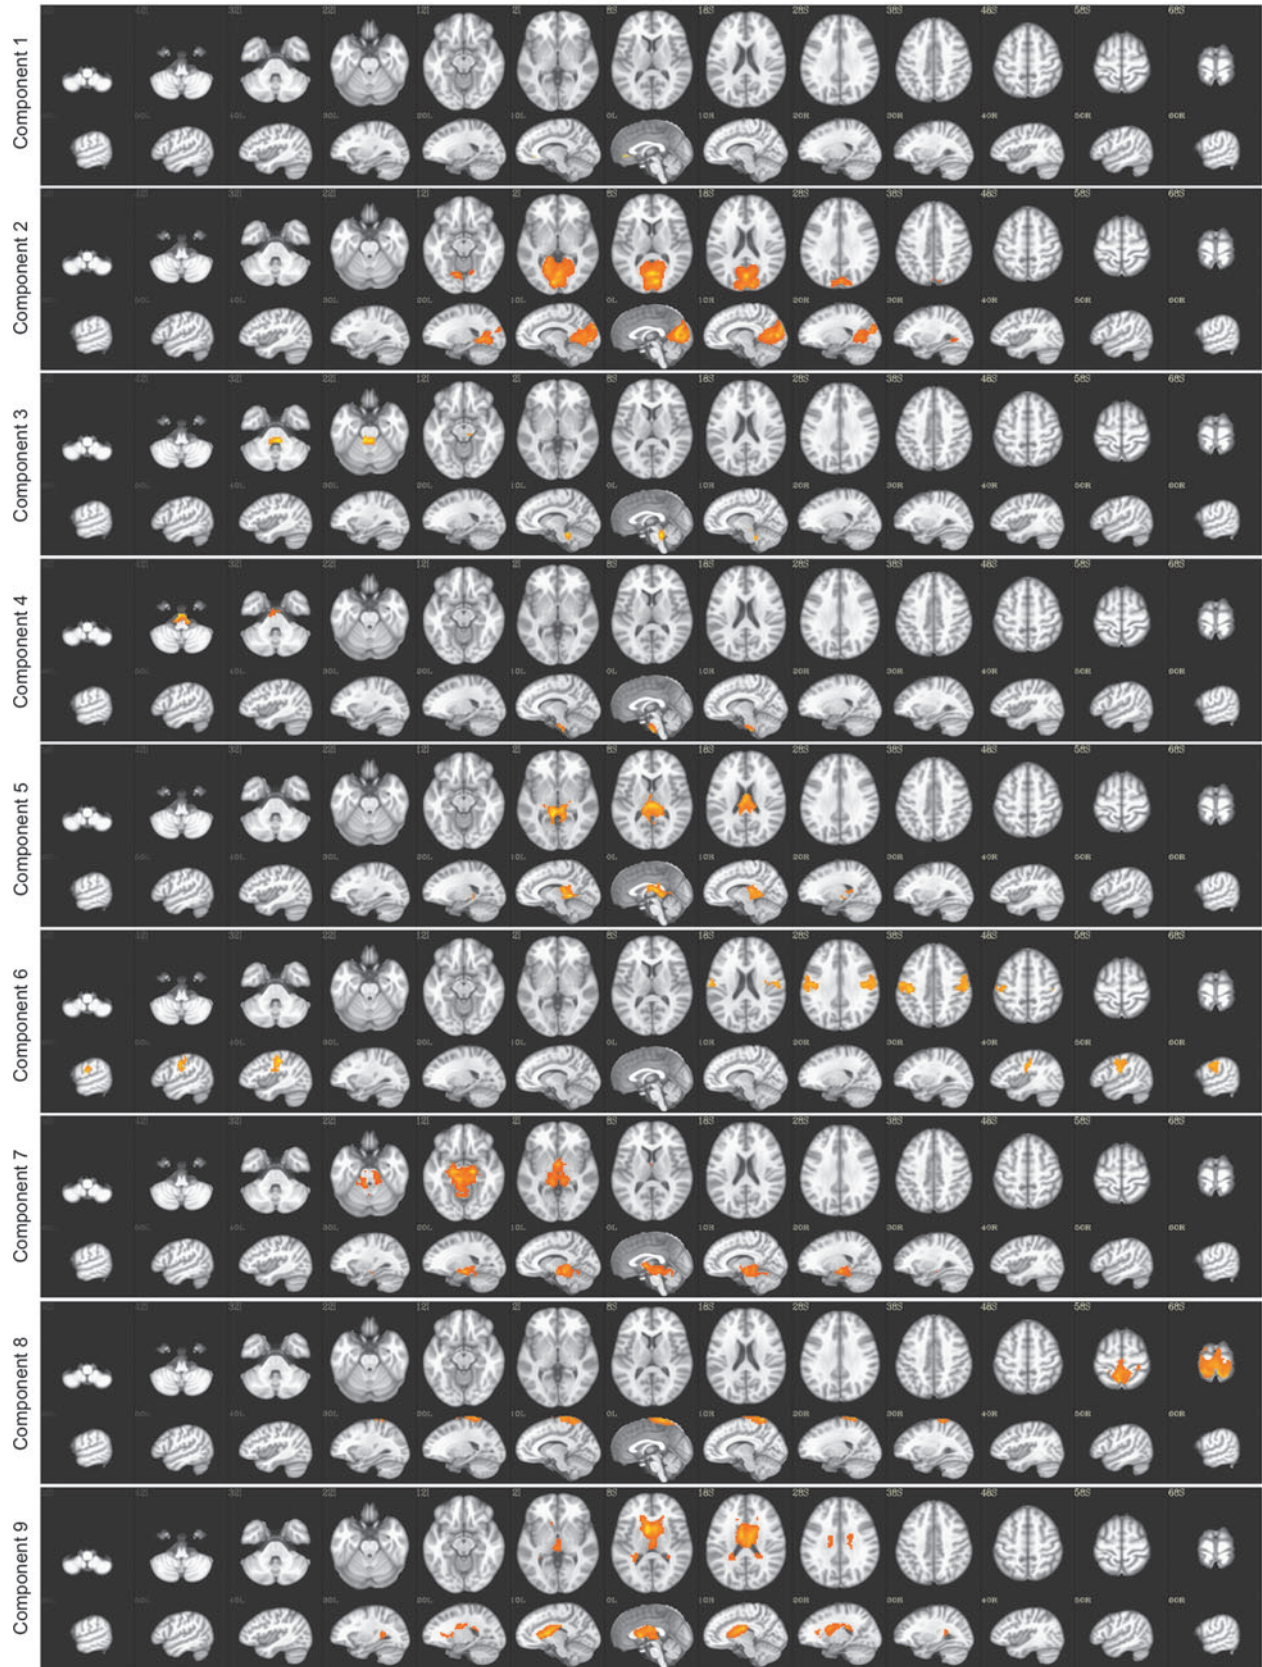

SUPPLEMENTARY FIG. S9.

Test – Visit 2

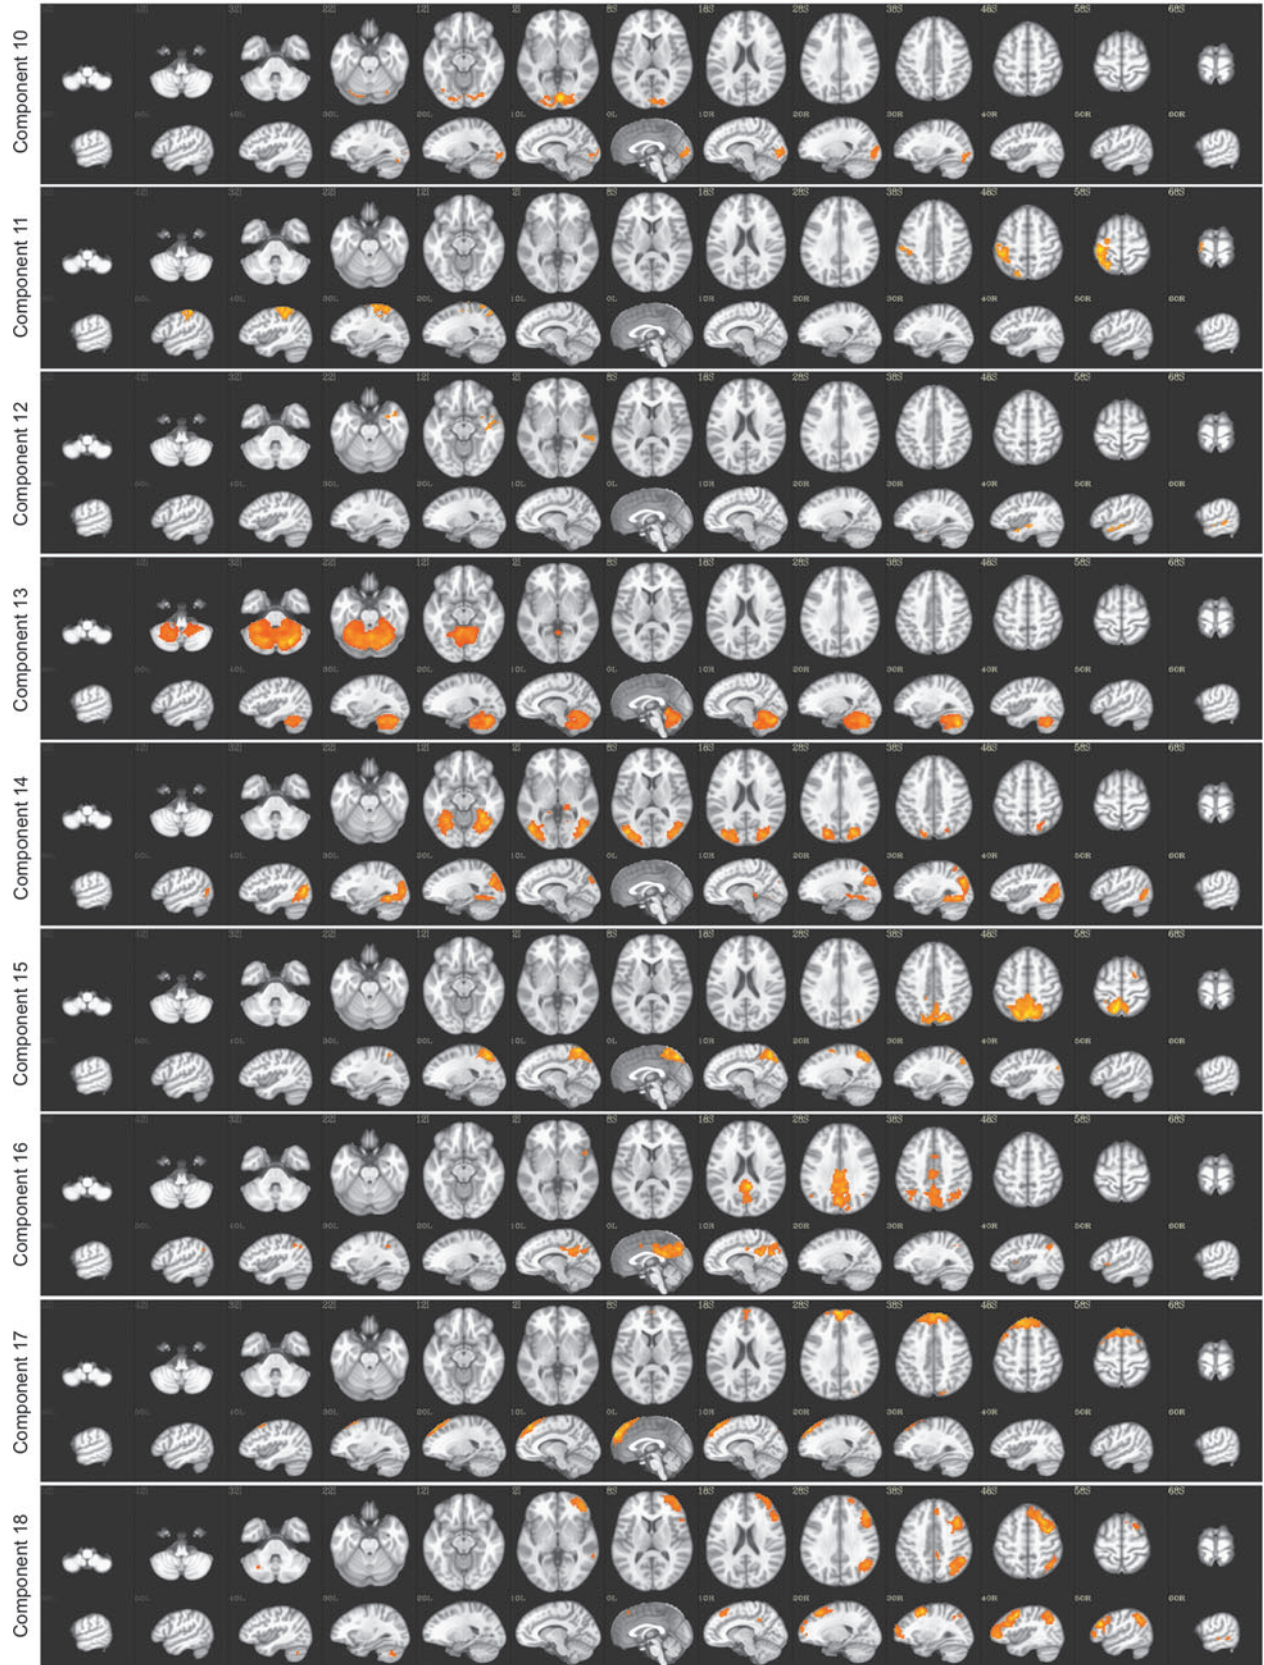

SUPPLEMENTARY FIG. S10.

Test – Visit 2

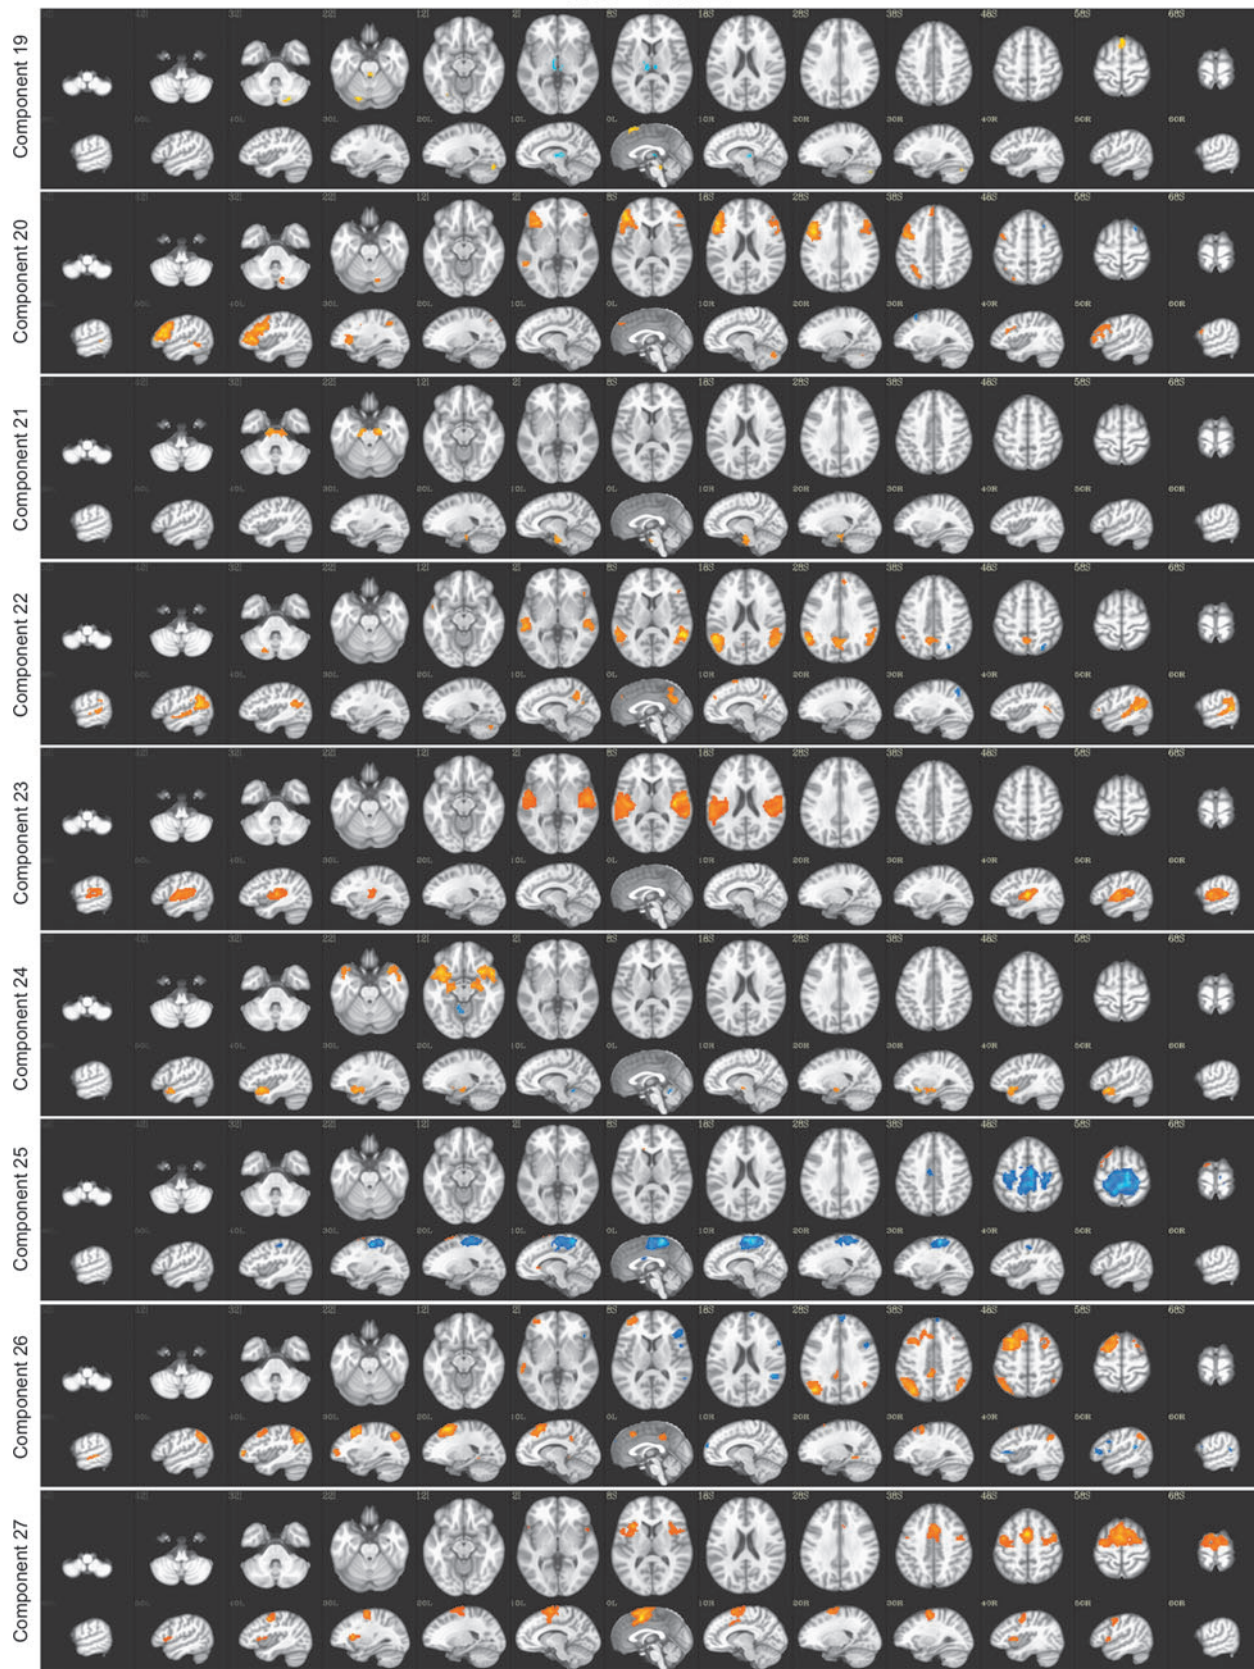

SUPPLEMENTARY FIG. S11.

Test – Visit 2

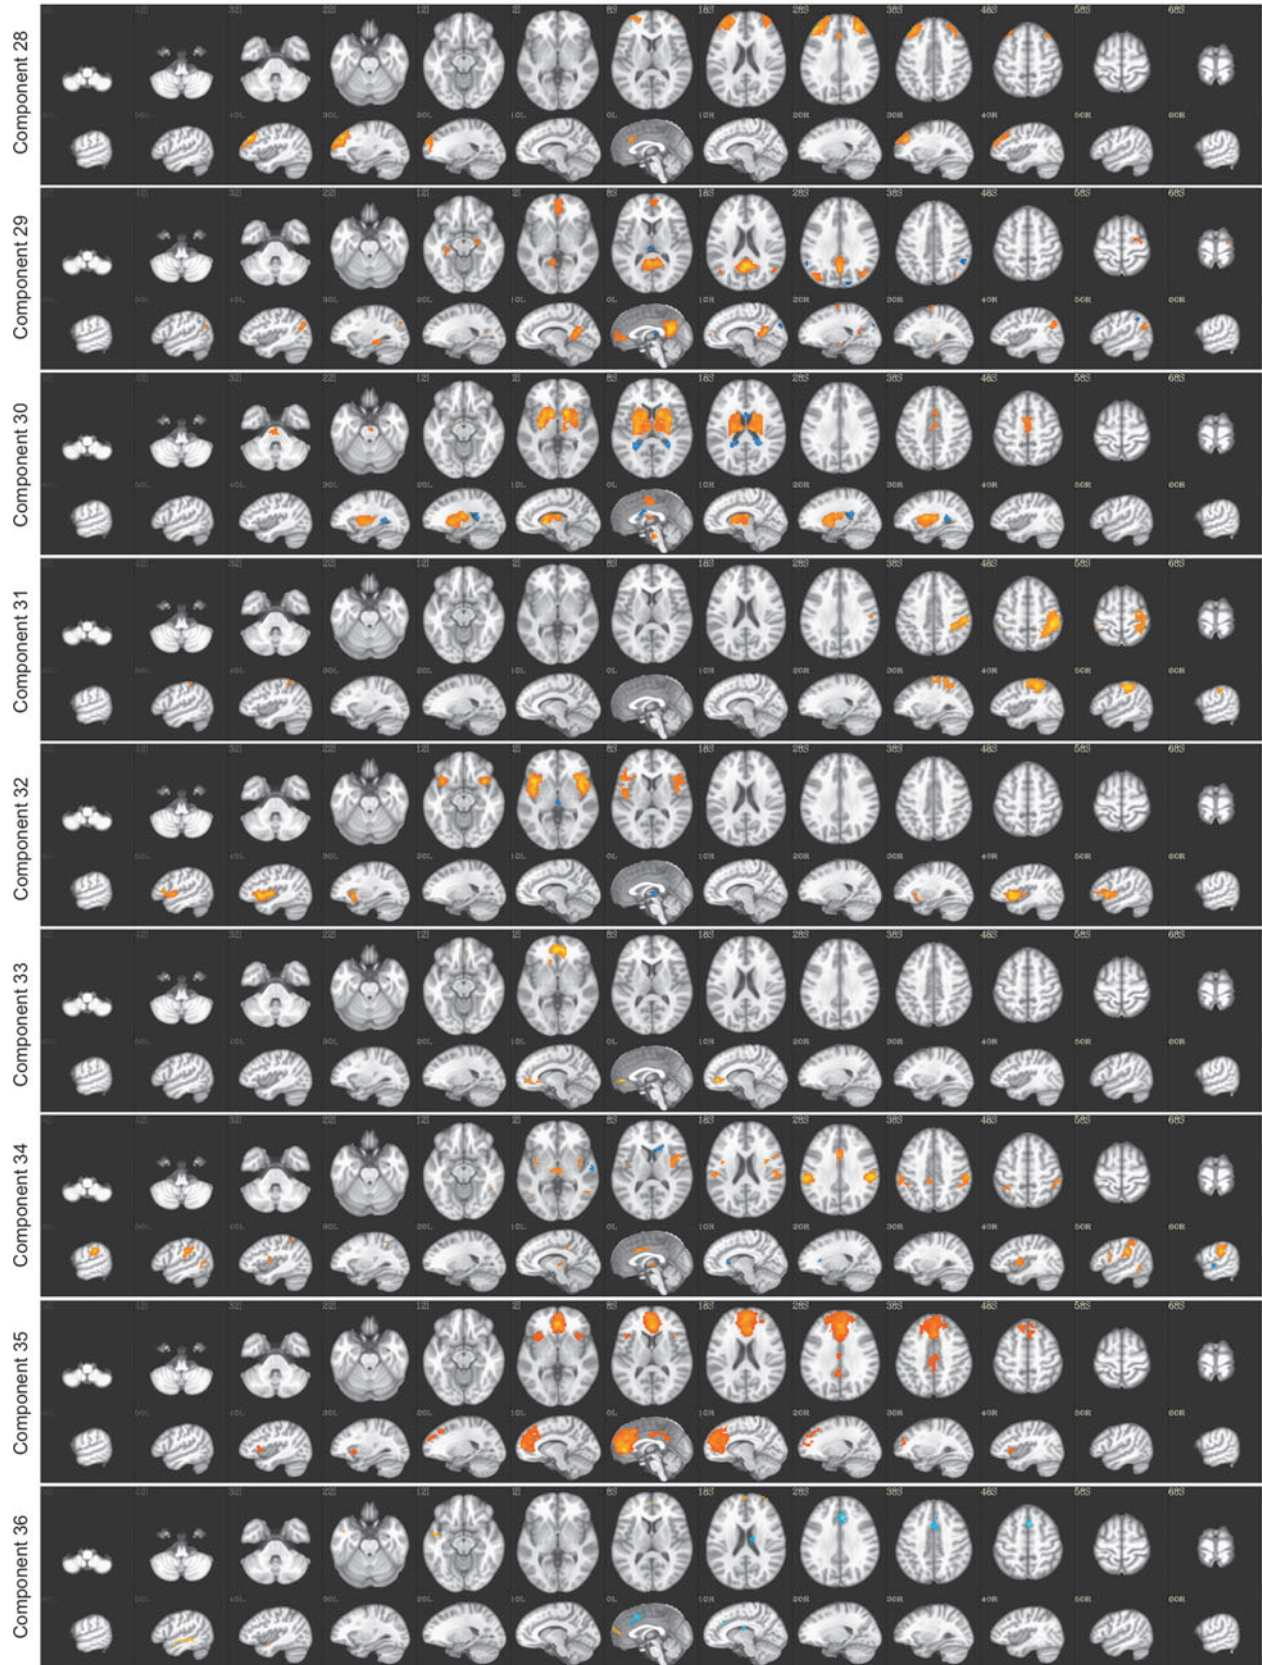

SUPPLEMENTARY FIG. S12.

Test – Both Visits

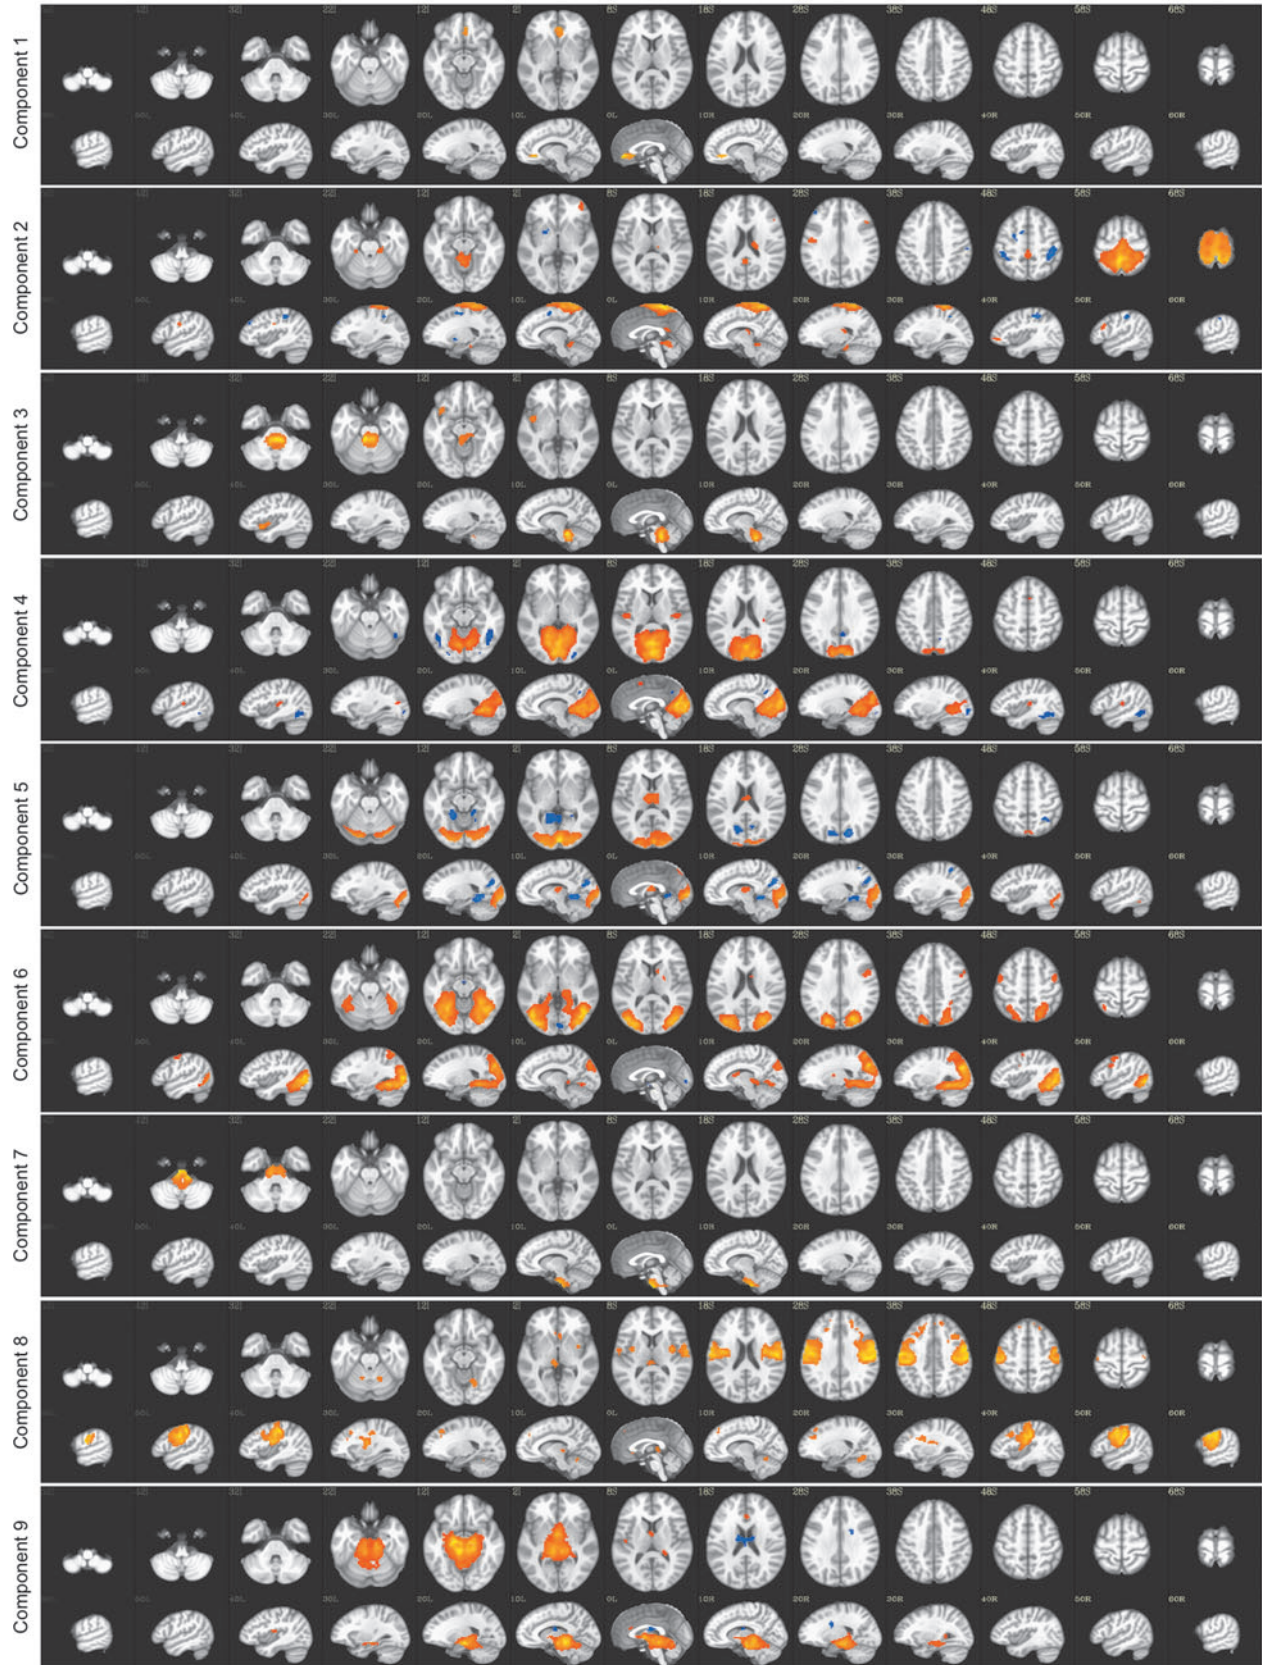

SUPPLEMENTARY FIG. S13.

Test – Both Visits

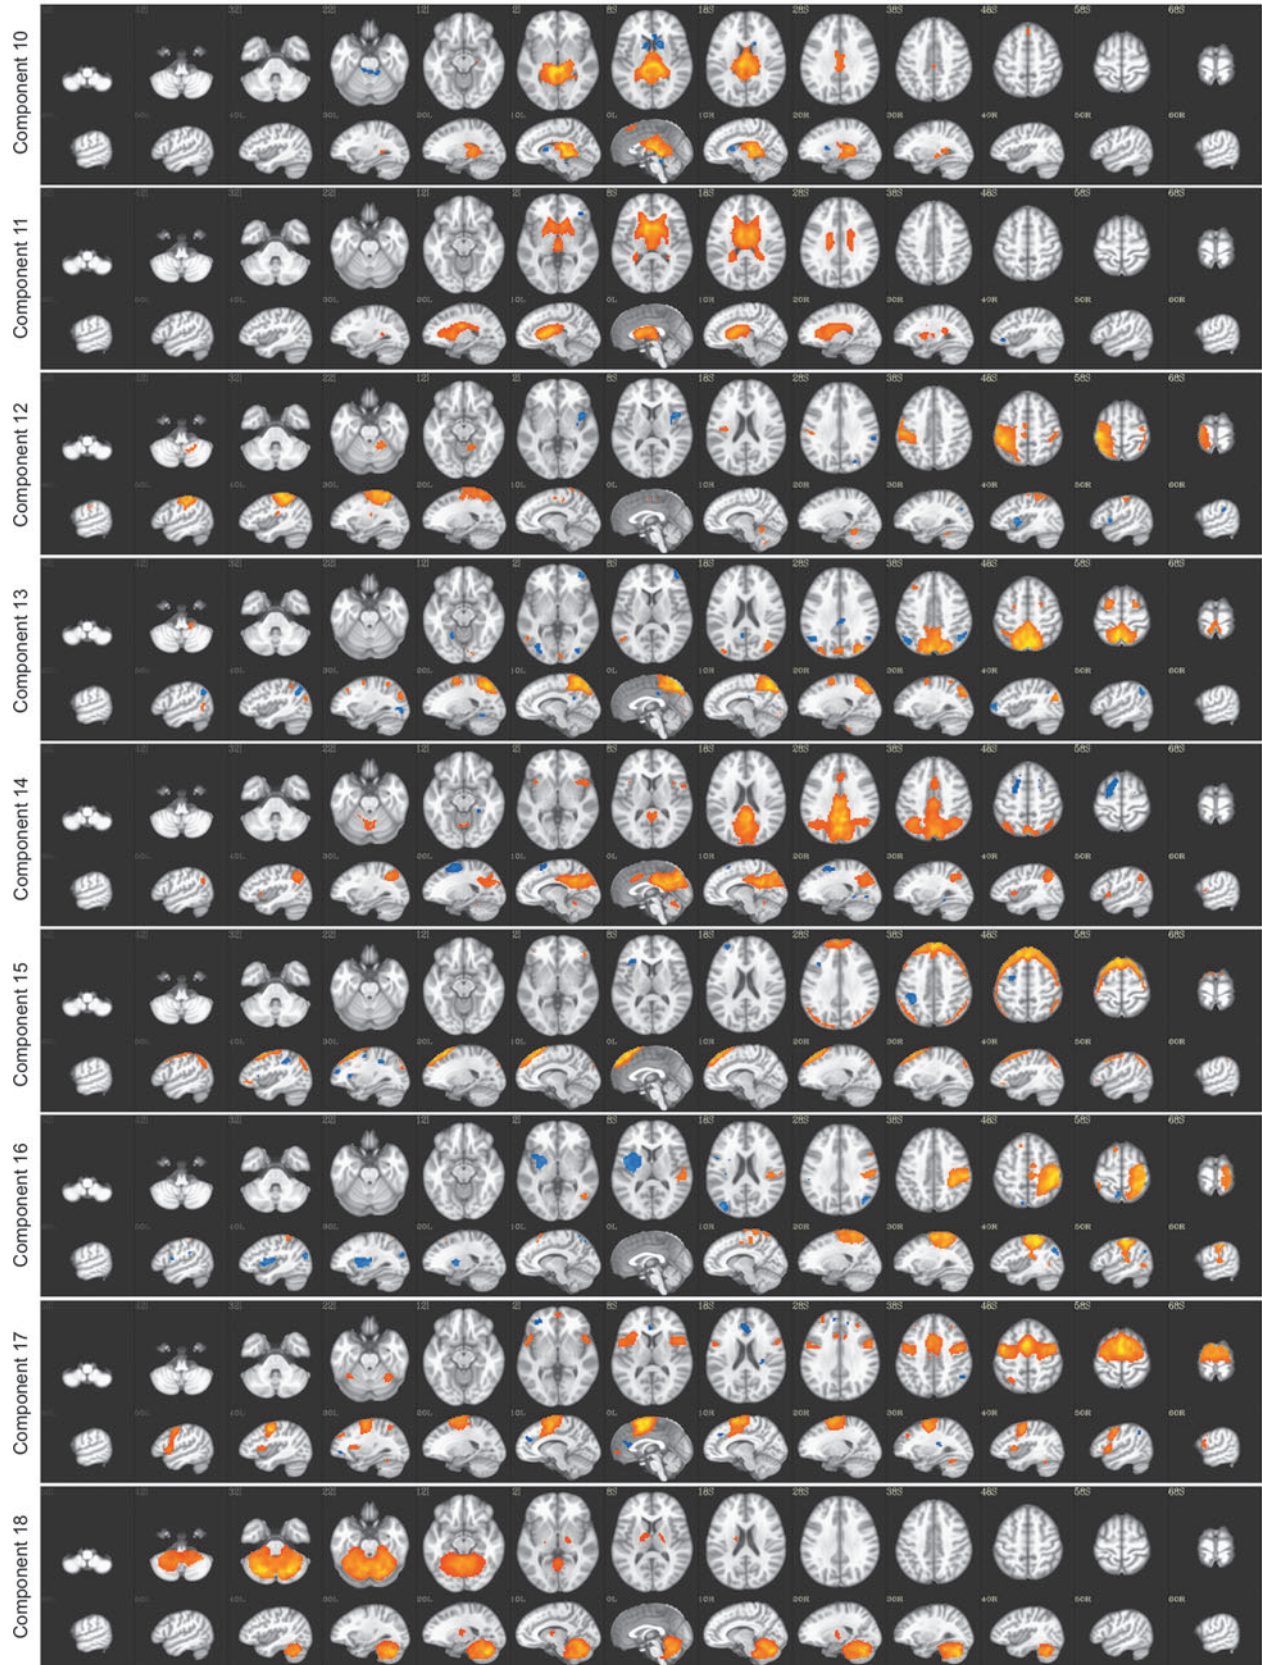

SUPPLEMENTARY FIG. S14.

Test – Both Visits

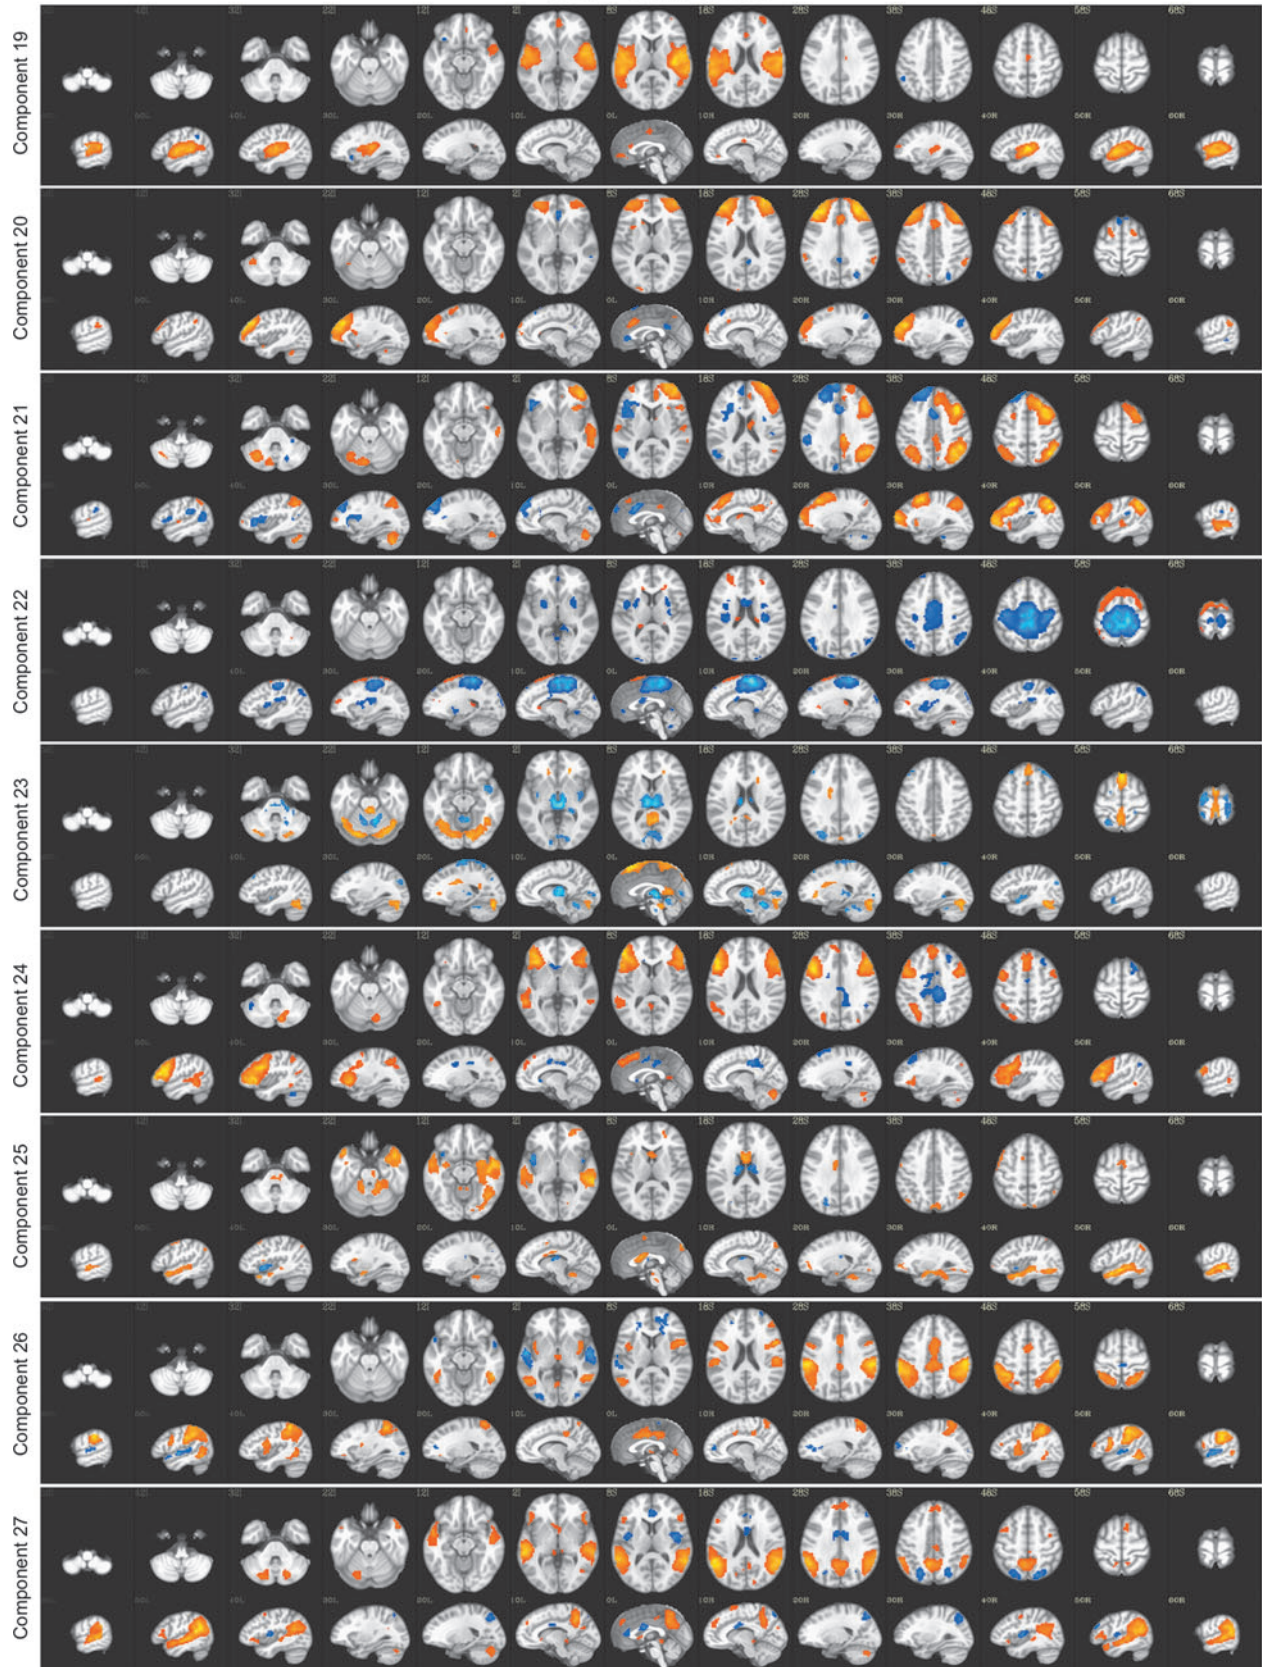

SUPPLEMENTARY FIG. S15.

Test – Both Visits

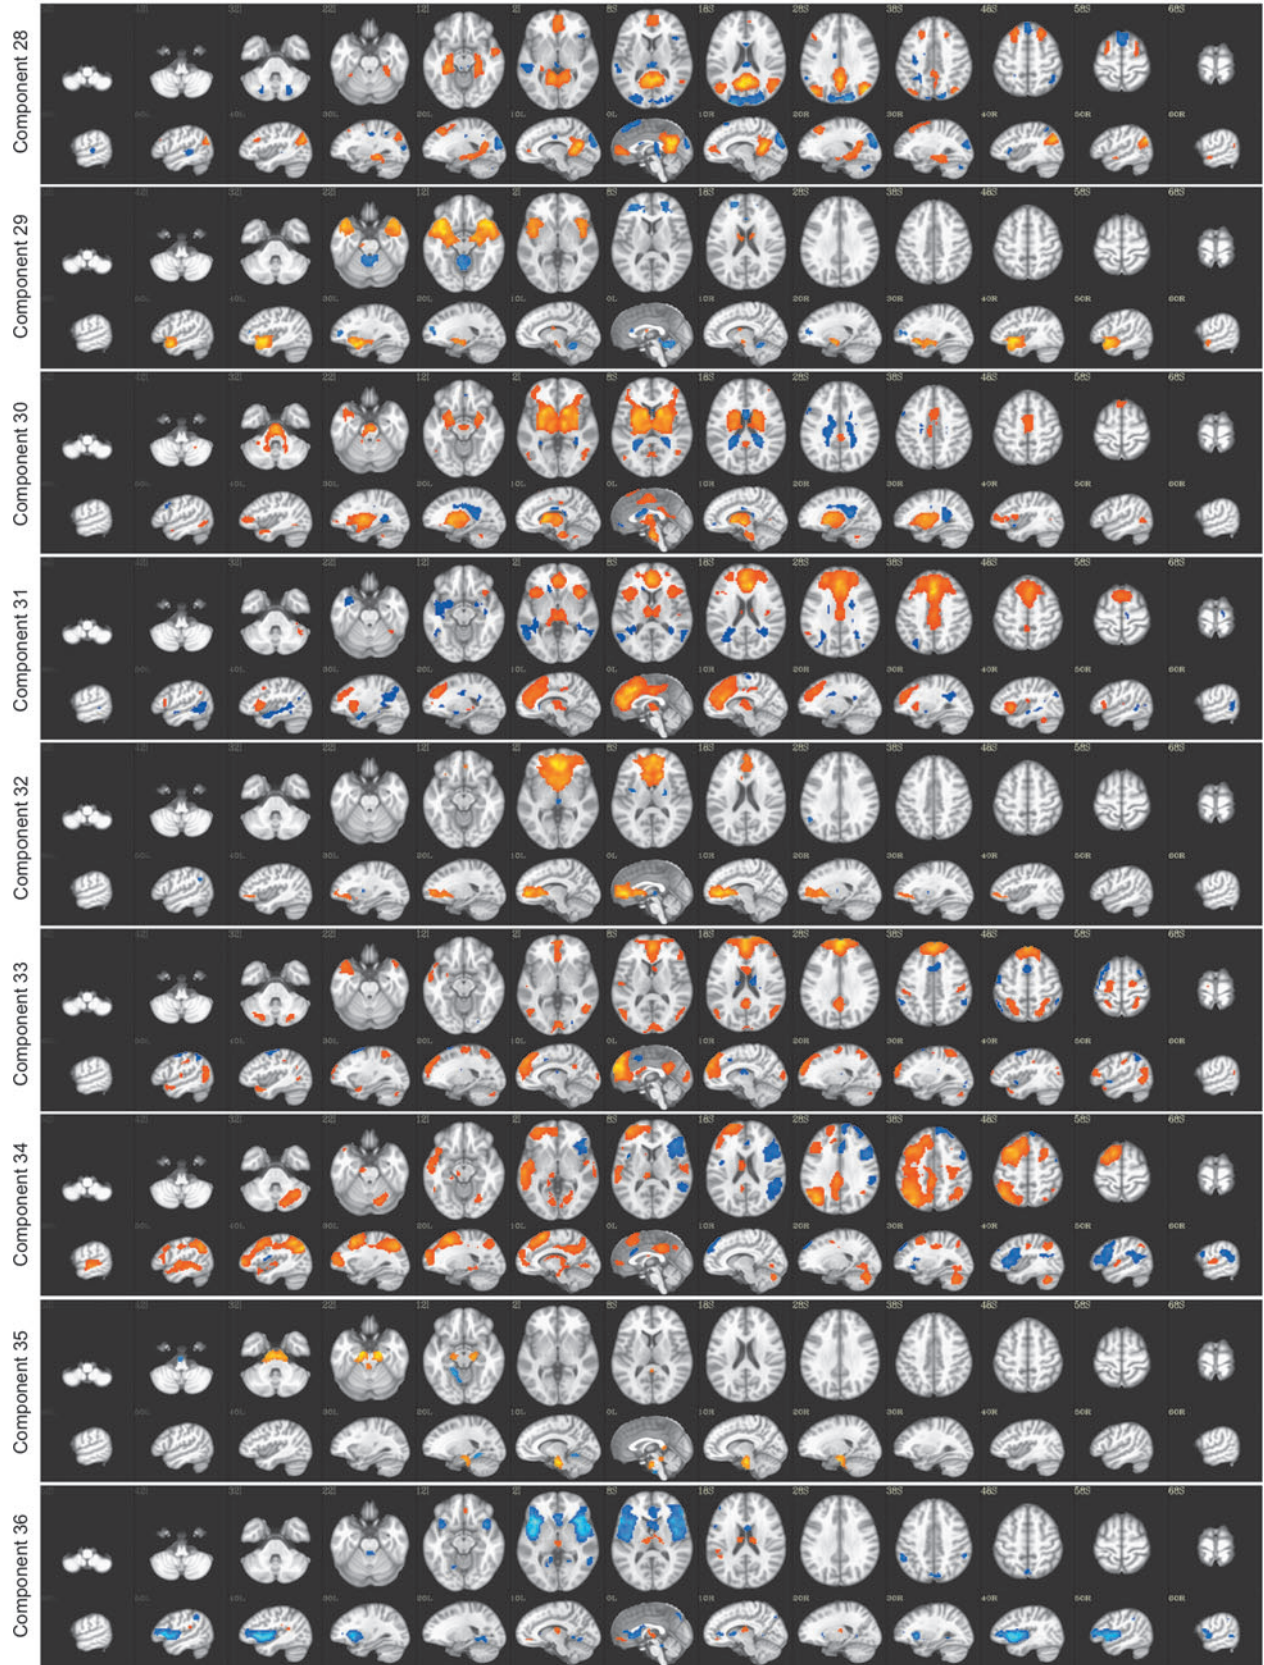

SUPPLEMENTARY FIG. S16.
