# Supplementary material
Source: PubMed Central journal article supplement (PMC3749744)
Supplement: Supp_Table1.pdf [file Supp_Table1.pdf]

Supplementary Tables S1. Anatomical Location, Coordinates, and Volume of the Model Dataset Maps, Corresponding to Figures 2 and 3 are Given

| Network Name             | Areas                                                                                                                        | Broadman Areas         | Side | CM LR | CM PA | CM IS | Volume ml |
|--------------------------|------------------------------------------------------------------------------------------------------------------------------|------------------------|------|-------|-------|-------|-----------|
| <b>Sensory-Motor RSN</b> |                                                                                                                              |                        |      |       |       |       |           |
| Somatomotor              | Precental gyrus, postcentral gyrus and Insula                                                                                | 4,3,13,43,6,42,41      | L    | -50   | -13   | 26    | 5.697     |
|                          | Precental gyrus, postcentral gyrus and Insula                                                                                | 13,4,6,43,2            | R    | 47    | -11   | 22    | 4.968     |
|                          | Insula and superior temporal gyrus                                                                                           | 13,41                  | L    | -40   | -28   | 15    | 0.432     |
| Primary visual           | Cuneus, lingual gyrus, culmen, posterior cingulate                                                                           | 18, 19, 30, 17, 31, 23 | M    | 1     | -70   | 6     | 39.96     |
| Secondary visual         | Middle occipital gyrus, fusiform gyrus, parahippocampal gyrus, cuneus, declive and Culmen                                    | 37, 19, 18, 36         | R    | 33    | -64   | -1    | 20.304    |
|                          | Middle occipital, fusiform, declive, cuneus, parahippocampal gyrus                                                           | 19, 37, 18             | L    | -32   | -68   | -1    | 17.955    |
| Auditory                 | Insula, Superior temporal gyrus, precentral gyrus, transverse temporal gyrus, inferior temporal gyrus                        | 13, 22, 41, 47, 43     | R    | 49    | -5    | 5     | 13.203    |
|                          | Insula, superior temporal gysus, precentral gyrus, transverse temporal gyrus,                                                | 12, 22, 41. 47, 43     | L    | -45   | -4    | 5     | 12.231    |
| <b>Association RSN</b>   |                                                                                                                              |                        |      |       |       |       |           |
| Anterior DMN             | Superior frontal gyrus, medial frontal gyrus and anterior cingulate                                                          | 9, 32, 8, 10, 24       | M    | 1     | 43    | 27    | 45.792    |
|                          | Posterior cingulate                                                                                                          | 23, 31                 | M    | 1     | -48   | 29    | 0.513     |
|                          | Cingulate gyrus                                                                                                              | 24                     | M    | 0     | -19   | 37    | 0.459     |
| Posterior cingulate DMN  | Posterior cingulate and precuneus                                                                                            | 30, 31, 23, 29         | M    | 0     | -54   | 15    | 13.257    |
|                          | Middle temporal gyrus, angular gyrus, superior temporal gyrus and precuneus                                                  | 39                     | R    | 44    | -67   | 27    | 0.999     |
|                          | Parahippocampal gyrus                                                                                                        | 35, 35                 | L    | -26   | -29   | -11   | 0.756     |
| Posterior precuneus DMN  | Precuneus, cingulate, posterior cingulate and cuneus                                                                         | 31, 7, 23              | M    | 1     | -49   | 31    | 18.603    |
| Right frontoparietal     | Inferior Parietal lobule, angular gyrus, precuneus, supramarginal gyrus and superior parietal                                | 40, 39, 7              | R    | 41    | -56   | 40    | 9.072     |
|                          | Middle frontal gyrus and precentral gyrus                                                                                    | 6, 8, 9                | R    | 43    | 20    | 36    | 4.104     |
|                          | Inferior, middle and superior frontal gyrus                                                                                  | 10                     | R    | 35    | 53    | 8     | 3.267     |
|                          | Inferior, middle and superior frontal gyrus                                                                                  | 6, 8                   | R    | 19    | 24    | 50    | 1.89      |
|                          | Middle temporal gyrus                                                                                                        | 21                     | R    | 58    | -29   | -6    | 1.08      |
|                          | Pyramis, Declive and Uvula of the cerebellum                                                                                 |                        | L    | -12   | -73   | -25   | 0.756     |
| Left frontoparietal      | Inferior parietal lobule, anglular gyrus, precuneus, middle temporal gyrus, supramarginal gyrus and superior parietal lobule | 40, 39, 19             | L    | -42   | -59   | 38    | 8.235     |
|                          | Middle and superior frontal gyrus                                                                                            | 6, 8                   | L    | -25   | 18    | 50    | 3.645     |
|                          | Middle temporal gyrus                                                                                                        | 21, 22,37              | L    | -55   | -40   | -3    | 2.025     |
|                          | Inferior and middle frontal gyrus                                                                                            | 10, 46                 | L    | -40   | 48    | 1     | 1.269     |
|                          | inferior and superior parietal lobule, angular gyrus and precuneus                                                           | 7, 19, 39              | R    | 42    | -64   | 39    | 0.945     |
| Executive Control        | Medial, middle and superior frontal gyrus, cingulate gyrus precentral gyrus                                                  | 6, 8, 24, 32           | M    | 6     | 5     | 54    | 28.35     |
|                          | Middle frontal gyrus and precentral gyrus                                                                                    | 4, 6                   | L    | -44   | -5    | 48    | 1.674     |

Clusters are indicated as being in either the left (L) or right (R) hemisphere, or within the midline (M) structures. All x, y, and z coordinates are given according to the Talairach atlas.
